# ZERO SHOT HEALTH TRAJECTORY PREDICTION USING TRANSFORMER

PREPRINT

Pawel Renc<sup>1,2,3</sup>, Yugang Jia<sup>4</sup>, Anthony E. Samir<sup>1,2</sup>, Jaroslaw Was<sup>3</sup>, Quanzheng Li<sup>1,2</sup>, David W. Bates<sup>5,2,6</sup>, and Arkadiusz Sitek<sup>1,2,\*</sup>

<sup>1</sup>Massachusetts General Hospital, Boston, USA

<sup>2</sup>Harvard Medical School, Boston, USA

<sup>3</sup>AGH University of Science and Technology, Krakow, PL

<sup>4</sup>Massachusetts Institute of Technology, Cambridge, USA

<sup>5</sup>Brigham and Women's Hospital, Boston, USA

<sup>6</sup>Harvard Chan School of Public Health, Boston, USA

\*Corresponding author: [sarkadiu@gmail.com](mailto:sarkadiu@gmail.com)

## ABSTRACT

Integrating modern machine learning and clinical decision-making has great promise for mitigating healthcare's increasing cost and complexity. We introduce the Enhanced Transformer for Health Outcome Simulation (ETHOS), a novel application of the transformer deep-learning architecture for analyzing high-dimensional, heterogeneous, and episodic health data. ETHOS is trained using Patient Health Timelines (PHTs)—detailed, tokenized records of health events—to predict future health trajectories, leveraging a zero-shot learning approach. ETHOS represents a significant advancement in foundation model development for healthcare analytics, eliminating the need for labeled data and model fine-tuning. Its ability to simulate various treatment pathways and consider patient-specific factors positions ETHOS as a tool for care optimization and addressing biases in healthcare delivery. Future developments will expand ETHOS' capabilities to incorporate a wider range of data types and data sources. Our work demonstrates a pathway toward accelerated AI development and deployment in healthcare.

**Keywords** Healthcare · Deep Learning · Transformer · Timelines

## 1 Introduction

Healthcare in the U.S. is the world's most expensive, and the quality and safety of care do not compare well to other developed countries Schneider and Williams II [2021]. While electronic healthcare records are now ubiquitous in the U.S., and decision-support technologies are widely implemented, most are rule-based, and their effectiveness so far has been limited Bates et al. [2022]. Artificial intelligence has emerged as a technique with great potential for improving care, but most organizations are not using it to any major degree. Two major limiting factors have been (1) the lack of large, labeled datasets, which are expensive and time-consuming to develop; and (2) limited system capacity to deliver recommendations to the appropriate clinician at the optimal time. In this manuscript, we describe a novel method called the Enhanced Transformer for Health Outcome Simulation (ETHOS), which we believe can help address many of the limitations that have prevented widespread AI adoption.

ETHOS is a novel application of the transformer deep-learning architecture, originally conceptualized for natural language processing Vaswani et al. [2017]. This architecture, a cornerstone in large language model (LLM) development, is repurposed in ETHOS to analyze health-related data, moving beyond the textual focus of traditional LLMs. ETHOS is designed to process Patient Health Timelines (PHTs)—detailed tokenized chronological records of health-related events—to predict future health timelines. In PHTs, a token serves as the fundamental unit of information, encapsulating diverse data types such as patient admissions, administered medications, or time intervals. We elaborate on this pivotal

# Zero Shot Health Trajectory Prediction Using Transformer

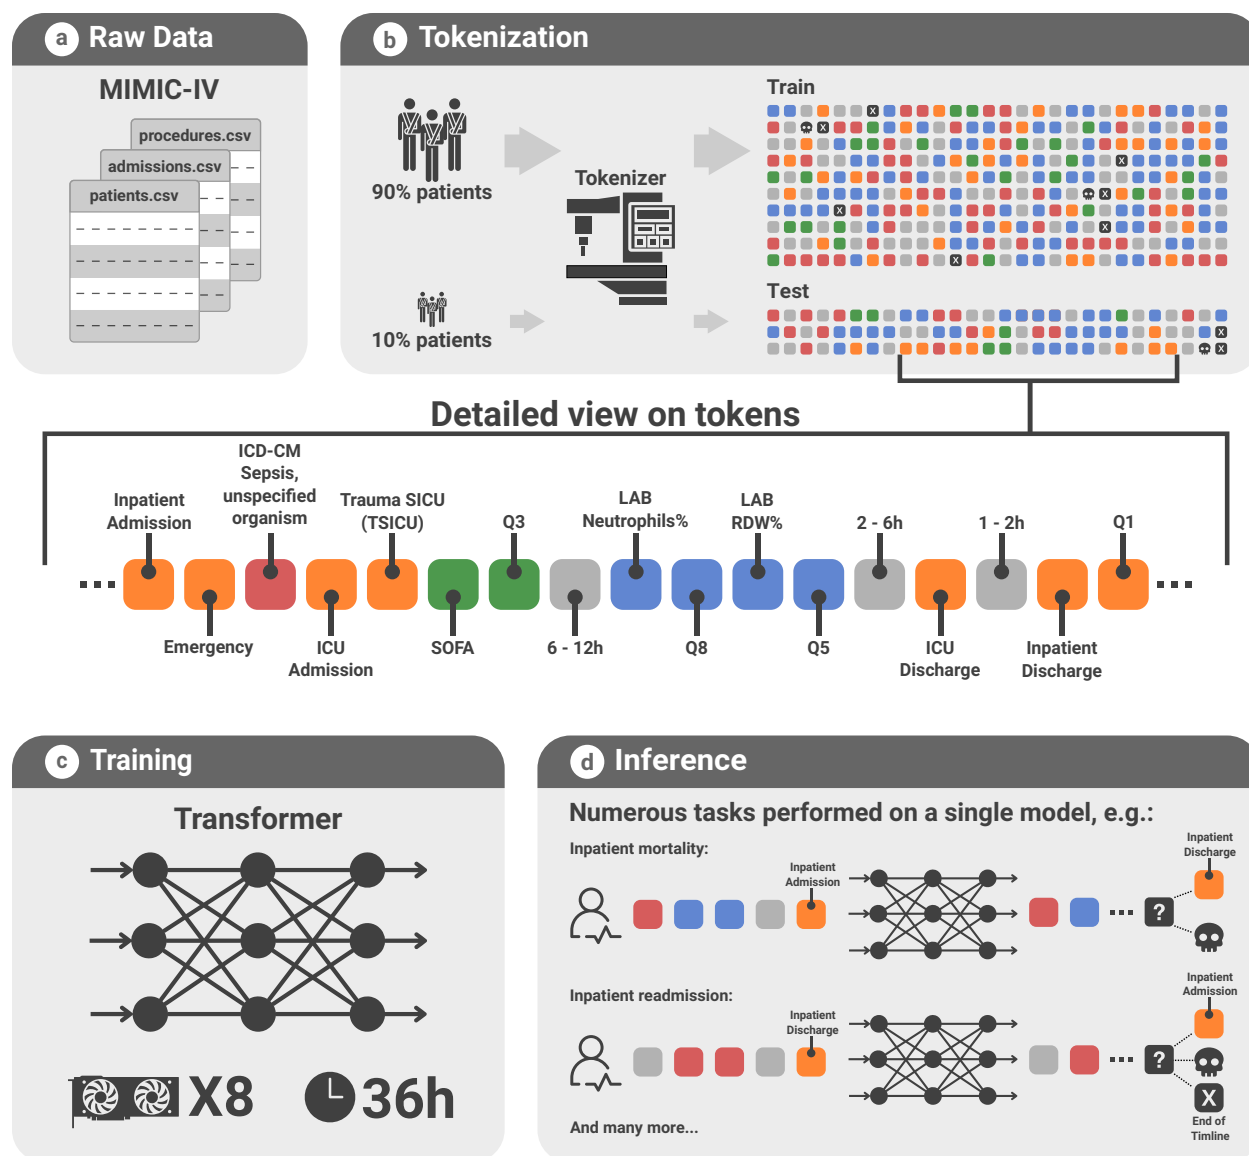

Figure 1: **Implementing the ETHOS Model with EMR Data.** (a) Extraction of raw patient data from the MIMIC-IV database, encompassing tables of admissions, patient demographics, medical procedures, among others. (b) The tokenization process, utilizing data from 90% of patients for model training and the remaining 10% for testing, transforms complex medical records into structured PHT for efficient model processing. (c) Training phase illustration, employing a transformer architecture optimized across 8 GPUs over a span of 36 hours. (d) Demonstration of ETHOS’s zero-shot inference capabilities, highlighting its proficiency in performing tasks such as predicting inpatient mortality and readmission rates, leveraging forecasted future PHTs.

aspect of our methodology in the Methods section. Our model takes the patient’s health history, as represented by PHT, and subsequently forecasts future PHT (fPHT) on a token-by-token basis (refer to Figure 1).

ETHOS’s generative capabilities are gained in unsupervised learning. Once trained, ETHOS can forecast future health events without requiring task-specific training. This is done through a zero-shot learning approach, making ETHOS a versatile foundation model for numerous healthcare applications. With appropriate modifications, ETHOS can be adapted to a broad range of data types, including but not limited to medical images, clinical and discharge notes, monitoring data, data from wearables, or omics data.

In this research, we leverage the recently released MIMIC-IV v.2.2 dataset Johnson et al. [2023], a rich open-source repository accompanied by our code, allowing others to replicate our findings. MIMIC-IV is expansive, chronicling

more than 400,000 hospitalizations in more than 200,000 patients. Although relatively large, we anticipate that the performance of our system will further improve as we expand the dataset with additional patient histories and data types.

Importantly, we utilize the MIMIC-IV dataset in its original noisy form without any data modifications, cleaning, or targeted imputation for missing entries. The information is retained in the face of large data inconsistencies, such as discharge dates noted before admission dates. We operated under the assumption that, within large enough datasets and appropriate tokenization and training methods, ETHOS would be robust enough to handle the noisy input and automatically manage the noise/anomalies in the input data. The resilience of ETHOS to data inaccuracies and missing information has important implications for the efficiency of downstream model development. Healthcare data inevitably contains errors, some of which may not be immediately apparent or easily rectifiable. Attempts to clean large datasets can be impractical and may inadvertently introduce biases and errors. Our approach highlights the vital need for algorithms adept at managing these challenges, a prerequisite for the large-scale development of reliable and robust healthcare AI applications.

Our research showcases the zero-shot learning capabilities of ETHOS in predicting inpatient and ICU mortality, estimating ICU length of stay (LOS), and determining readmission probabilities. Additionally, we illustrate the model's versatility by performing a regression task to estimate the first-day Sequential Organ Failure Assessment (SOFA) score Raith et al. [2017] at the time of ICU admission using information before admission (see example in Figure 1d). The SOFA score is a critical tool for monitoring a patient's condition in the ICU, evaluating organ function or failure across six systems—respiratory, cardiovascular, hepatic, coagulation, renal, and neurological—with each system scored from 0 to 4, culminating in a total possible minimum score of 0 and maximum score of 24. Furthermore, we predict Diagnostic-Related Group (DRG) classifications, encompassing over 771 categories, at the time of hospital discharge. The DRG system categorizes hospital cases into standardized case complexity-based Medicare and Medicaid payment groups, encouraging efficient patient care without compromising quality. The diversity of tasks ETHOS can perform, from mortality predictions and LOS estimation to SOFA scoring and DRG classification, highlights its broad applicability and zero-shot learning efficiency.

ETHOS is a foundation model Moor et al. [2023], introducing a novel approach in the landscape of data analysis within the healthcare domain. The other foundational models developed recently have fallen into two broad categories. The first of these categories encompasses Clinical Language Models (CLaMs), a specialized subset of large language models (LLMs) Brown et al. [2020] tailored for processing clinical and biomedical text data. These models are typically trained on extensive datasets containing clinical notes, biomedical literature, and other healthcare-related text sources. CLaMs are proficient in various clinical tasks such as extracting drug names, summarizing medical dialogues, predicting clinical outcomes, and responding to patient queries Wornow et al. [2023], Zack et al. [2024], Li et al. [2019], Jiang et al. [2023], Wang et al. [2024]. The second category comprises Foundation Models for Electronic Medical Records (FEMRs), representing another class of clinical foundation models tailored specifically for EMR data analysis. FEMRs undergo training on the extensive medical histories of patients, covering both structured data (such as demographics and lab results) and unstructured data (including progress notes and radiology reports). Unlike CLaMs, FEMRs are not designed to generate clinical text. Instead, they produce machine-understandable representations of patient data, facilitating tasks such as patient phenotyping and outcome prediction Jiang et al. [2023], Steinberg et al. [2021], Li et al. [2023], Savcicens et al. [2024]. Similarly, data that chronicles human lives, akin to EMR, can also be modeled effectively in this manner.

The primary distinction between ETHOS and previously published methods lies in our approach, which eliminates the need for fine-tuning or labeled data to produce accurate inferences or predictions. We demonstrate inference across a wide array of tasks without task-specific training. Moreover, the ability of ETHOS to forecast future PHTs opens the door to a wide array of bespoke and innovative applications, facilitating its use in unique scenarios in healthcare, some of them explored in the discussion section. Unlike many studies, which often apply specific criteria for selecting data for training and testing, our methodology imposes no such limitations. This feature is crucial for considering the scalability of the ETHOS approach to data sets comprising millions or even hundreds of millions of patients.

## 2 Results

### 2.1 Tokenization of MIMIC data and training of ETHOS

Figure 2a summarizes some statistics of the tokenization process, including the number of tokens generated and other details. Figure S3b presents visualizations of the 768-dimensional embeddings reduced to a 2D plane using Principal Component Analysis (PCA) for quantile tokens, which encode all quantitative values in the data. The tokens are arranged from Q1 (the lowest quantile) to Q10 (the highest quantile). This suggests that the transformer model has learned a sequential relationship between the tokens that mirrors their natural order, ascertaining this order from the data

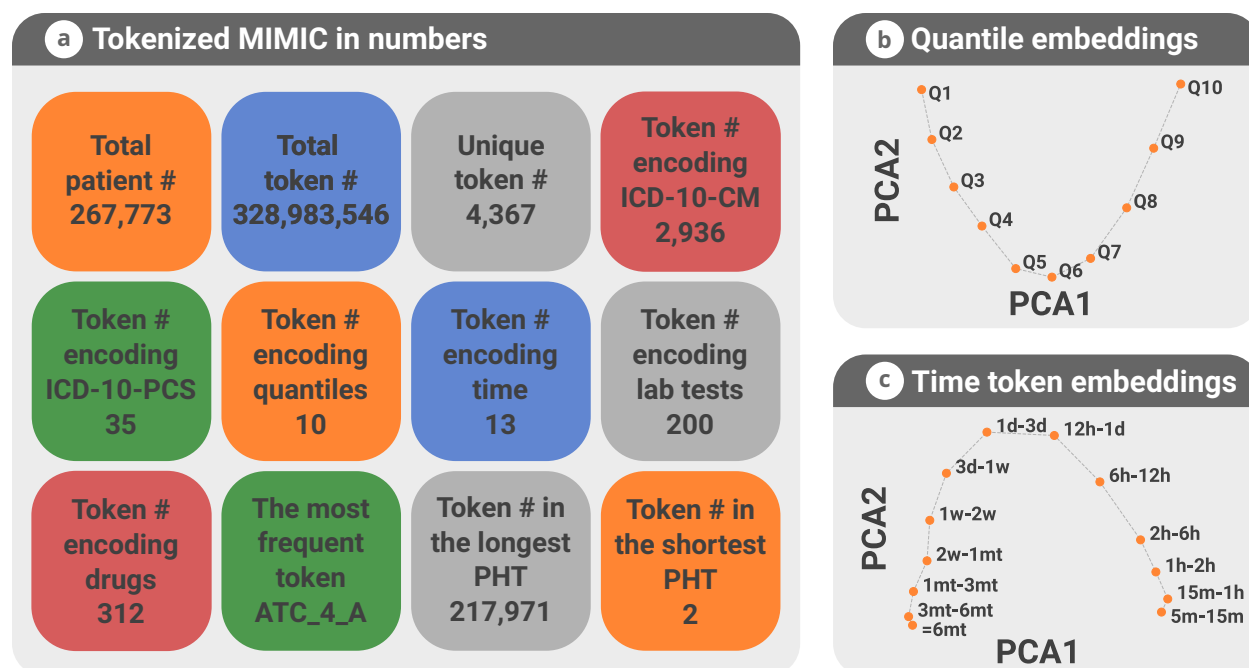

Figure 2: **Tokenization and Embedding Visualizations of MIMIC-IV Data.** (a) Overview of key insights derived from the tokenization process applied to MIMIC-IV data. (b) Visualization of embedding vectors for quantile tokens (Qs), which categorize quantitative information across the dataset. Each quantitative measure (e.g., blood pressure) is encoded by a preceding category-specific token followed by a quantile token, delineating its position within a predefined value range. This method facilitates a structured, scalable representation of complex data types via a systematic token sequence. (c) Visualization of embedding vectors for time-interval tokens, illustrating the temporal distribution and relationships within the PHT.

during the training process. The proximity between points could reflect the model's differentiation among the quantiles. We observe that the gaps between Q4, Q5, and Q6 are narrower than those between Q9 and Q10. This may suggest that the model deems the variance between population-average values to be less substantial than that of extremely high values. For example, the difference in clinical significance between a blood pressure reading of 110 mmHg (Q5) and one of 130 mmHg (Q6) is less pronounced than the difference between 140 mmHg (Q9) and 160 mmHg (Q10), which could account for the greater disparity in the embedding vectors of high quantiles.

The embeddings for time-interval tokens, representing the approximate durations between different tokenized events in PHT, are illustrated in Figure S3b. These embeddings display a pattern analogous to that observed for Q tokens, where ETHOS systematically arranged them according to the actual time values they represent. Remarkably, the model perceives the two shortest (5m-15m, 15m-1h), and two longest (3m-6m, 6m) intervals as relatively similar.

## 2.2 ETHOS inferences

In our study, we conducted zero-shot inferences for a diverse array of classification tasks, including readmission to the ICU, inpatient mortality, ICU mortality, combined inpatient and ICU mortality in patients with sepsis, readmission to the ICU for patients with intracerebral hemorrhage, assignment of DRG class assessed at inpatient discharge. We also demonstrate regression of first-day SOFA score at the time of ICU admission and regression of the length of stay in ICU in days assessed upon admission. The results corresponding to these tasks are summarized in Figure 3. We also provide precision-recall curves of the corresponding results in Figure S7.

To situate our results within the broader scientific discourse, we conducted a literature review, concentrating on contemporary studies that utilized the MIMIC-III and MIMIC-IV datasets for similar tasks and reported their outcomes. A notable observation from our review is that many of these studies either lacked publicly available source code or implemented specific exclusion criteria for their data selection. Such practices pose challenges for directly comparing their results with our approach. Nonetheless, we posit that the numerical outcomes reported in these works provide a valuable benchmark for assessing the performance of ETHOS. Furthermore, we conducted a direct comparative

# Zero Shot Health Trajectory Prediction Using Transformer

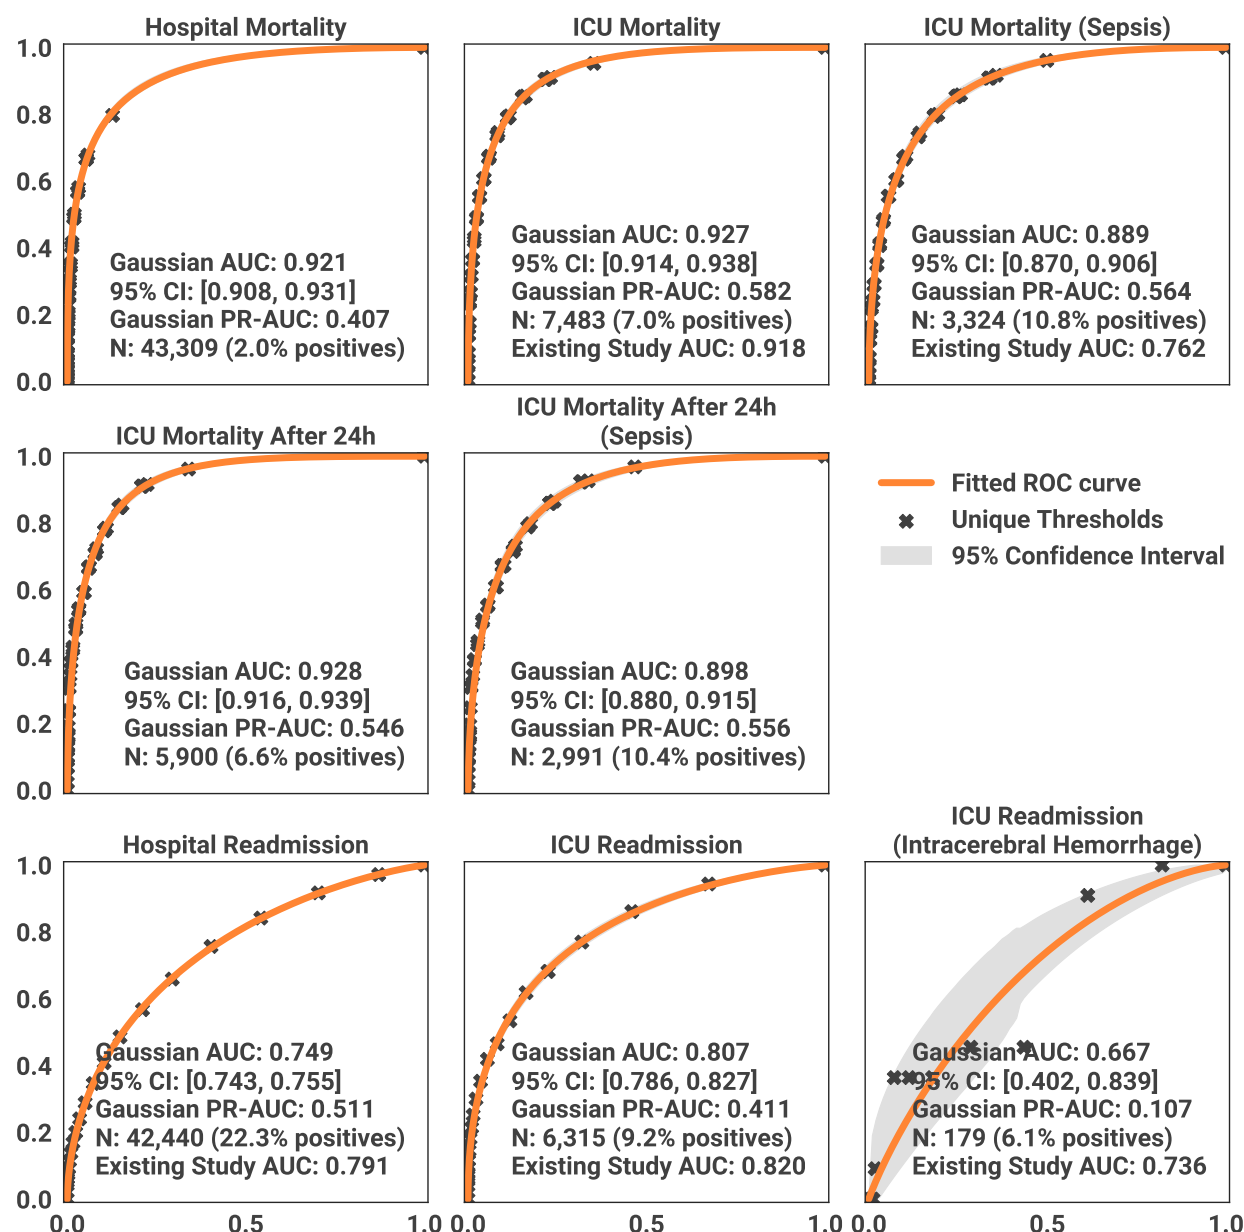

Figure 3: **Receiver Operating Characteristic (ROC) Curves for Predictive Tasks via the ETHOS Model.** Each graph delineates the model's efficacy in forecasting distinct clinical outcomes, specifically mortality and readmission rates. Accompanying each ROC curve are the case count (N), the outcome prevalence, and the 95% confidence interval for the AUC. Points marked with an 'X' denote specific thresholds utilized for classification decisions within the ETHOS model. Area under precision-recall (PR) curves is also provided and PR-curves are presented in supplementary material. The AUC of the existing study represents the performance of the best algorithms identified in the literature, with references provided within the text.

analysis of ETHOS against specialized algorithms developed in-house, with these findings detailed in the supplementary materials.

We conducted an analysis focusing on risk estimation for inpatient and ICU mortality, calculated at the respective points of patient admission to the hospital and ICU. The test set comprised 43,309 hospital admissions with a 2.0% mortality and 7,483 ICU admissions with a 7.0% mortality. The ETHOS model demonstrated robust performance, achieving an AUC of 0.921 (95% CI: 0.908-0.931) for hospital mortality and 0.927 (95% CI: 0.914-0.938) for ICU mortality. Comparatively, in the ICU mortality risk prediction domain, the highest performance identified in our literature review was an AUC of 0.918 (95% CI: 0.915-0.922) reported by Pang et al. [2022] using the XGBoost model. On the lower end, Chen et al. [2023] reported an AUC of  $0.642 \pm 0.101$ . Within a specific subgroup of the test set of 3,324 patients with sepsis with 10.8% mortality prevalence, ETHOS's prediction of ICU mortality exhibited an AUC of 0.889 (95% CI: 0.870-0.906), which is a better performance than obtained in a study by Pan et al. [2023], which estimated ICU mortality in adult sepsis patients using SOFA and additional features, achieving an AUC of  $0.762 \pm 0.006$ . We also estimated performance for a task of ICU mortality estimation for patients remaining in ICU for at least 24 hours in which we obtained an AUC of 0.928 (95% CI: 0.916-0.939).

Furthermore, ETHOS estimated the length of stay (LoS) in the ICU with a mean absolute error (MAE) of 2.262 days (95% CI: 2.161-2.355 days). These results paralleled those of [18], who reported an MAE of  $2.42 \pm 0.10$  days. ICU LoS prediction and mortality risk, underscoring the competitive zero-shot performance of ETHOS across multiple key healthcare metrics.

For the ICU readmission task, ETHOS' AUC of 0.807 (95% CI: 0.786-0.827) is slightly smaller than the AUC of 0.82 obtained using knowledge graph embeddings Carvalho et al. [2023] and is higher than the AUC of 0.791 (95% CI, 0.782-0.800) using LSTMs based on MIMIC-III data Lin et al. [2019]. Additionally, we applied our method to a task characterized by a relatively low prevalence, specifically focusing on only 174 cases of patients with hemorrhage admitted to the ICU present within our test set. The prediction of readmission by ETHOS yielded an AUC of 0.667 (95% CI: 0.402-0.839), comparable to the AUC of 0.736 (95% CI: 0.668-0.801) achieved by previous studies Miao et al. [2024] using LightGBM. For hospital readmission, ETHOS achieved an AUC of 0.749 (95% CI: 0.743-0.755), lower than the AUC of 0.791 [0.766-0.816] obtained by Tang et al. [2023]. It's important to recognize that although MIMIC offers a wealth of data on acute care, it might not encompass all the subtleties necessary for readmission research, including comprehensive post-discharge outcomes or data on readmissions to various hospitals. Consequently, the accuracy of results for tasks related to readmission may be limited, regardless of the method employed.

We explored the task of predicting the first-day SOFA score at the time of admission (Figure 4). Given that the SOFA score is a critical indicator of survival, particularly in sepsis Raith et al. [2017], Minne et al. [2008], this prediction can serve as a valuable indirect prognostic marker of ICU patient health status. We achieved a SOFA score estimation with an MAE of 1.502 (95% CI: 1.475-1.534). To our knowledge, no prior literature predicts first-day SOFA at the time of admission.

For the DRG assignment, we observed a top-1 (out of 771 classes) accuracy rate of 84.8% (95% CI: 84.4%-85.2%) in 28,932 hospitalizations using our methodology, a significant improvement over the 52% reported by Wang et al. [2024], who explored DRG estimation using LLMs from discharge notes. This marked enhancement in performance can be attributed to the comprehensive nature of ETHOS, which incorporates a wide array of clinical events leading up to discharge within the PHT. In contrast, the approach taken by Wang et al. [2024] relies solely on discharge notes, which may not encompass the breadth of information captured by PHT, thus potentially explaining the disparity in accuracy rates.

We want to reiterate an important point: all comparisons presented in this section are made between ETHOS, trained indiscriminately on the entire test population and task-specific algorithms developed using much smaller MIMIC data subsets obtained after data curation. In addition to the results in this section, in supplementary materials, we benchmark the performance of ETHOS against XGBoost Chen and Guestrin [2016], recurrent neural networks, and logistic regression.

### 3 Discussion

This work introduces an innovative approach to developing a Foundation Model for medical data derived from EMRs, designed to execute zero-shot inferences across a diverse range of tasks. Our model generates interpretable, causally forecasted future patient health timelines. By "causal," we mean that predictions are made solely based on information that occurred in the past. We applied and evaluated this model using the MIMIC-IV EMR datasets, comparing its performance with the results of methods published in the literature for the same tasks. Our objective, however, was not merely to surpass the performance of these specialized SOTA implementations. Instead, we aimed to demonstrate

# Zero Shot Health Trajectory Prediction Using Transformer

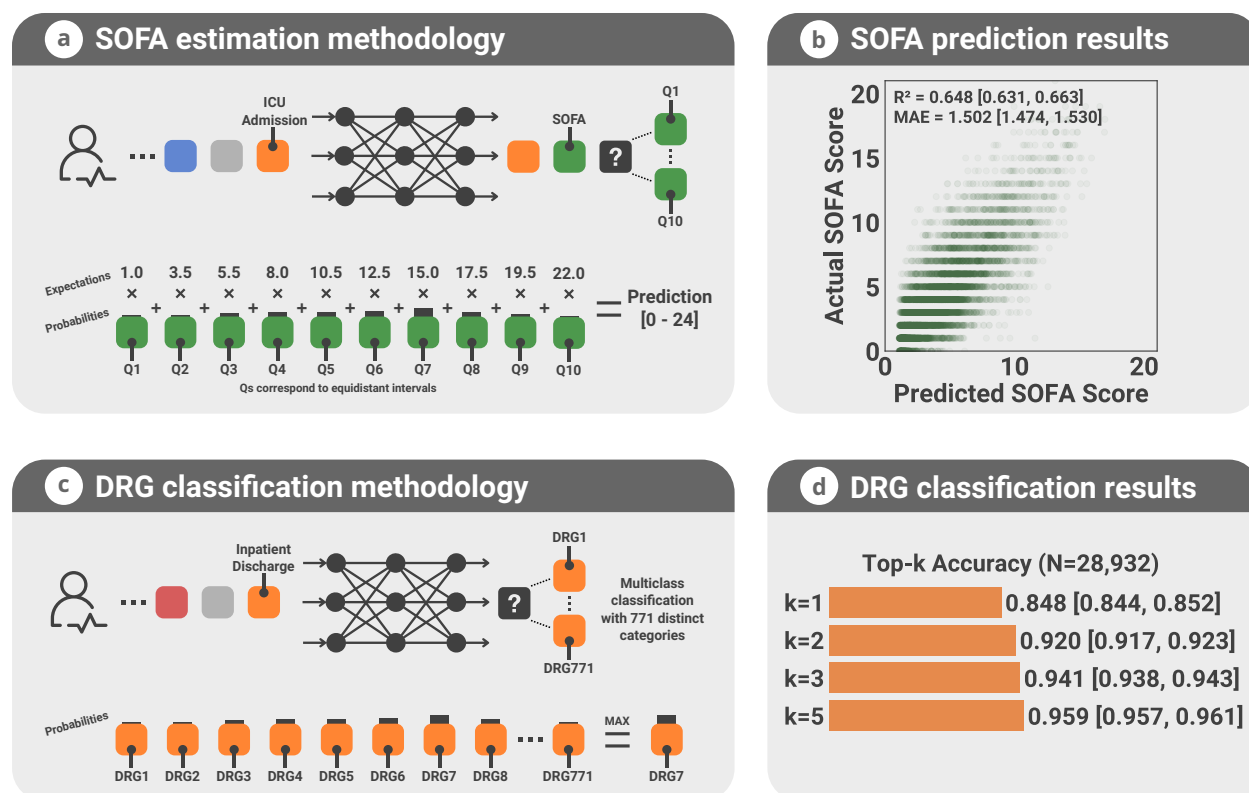

**Figure 4: ETHOS Model Performance on SOFA Estimation and DRG Classification.** (a) Estimation of the first-day Sequential Organ Failure Assessment (SOFA) score at ICU admission by ETHOS, which generates a sequence of three tokens: the admission type (orange token), a SOFA token (indicating the SOFA score estimation will follow), and a quantile token (q-token indicated by question mark) predicting probabilities of the SOFA score’s quantile, as detailed at the bottom of the panel (a). The fixed position of the SOFA token ensures its consistent prediction immediately after ICU admission. The SOFA score is derived using quantile probabilities generated by ETHOS and average value of SOFA for ten quantiles (values of 1.0, 3.5 ...). Since SOFA value 24 was not present in the dataset we predict values 0-23. (b) Correlation plot between actual and predicted SOFA scores. (c) For Diagnostic Related Groups (DRG) classification. The model is trained to insert a DRG token after tokens typically used at discharge time, utilizing a placeholder “DRG\_UNKNOWN” for if DRG is unknown in the training set. Predicted probabilities are used to compute the top-1,2,3,5 DRG classifications. (d) Visualization of DRG classification accuracy, showcasing the model’s predictive performance.

that ETHOS, a single foundation model trained just once with zero-shot derived inference, can achieve performance levels comparable to that of multiple models optimized for various tasks. This underscores the potential of ETHOS to streamline the application of AI in healthcare by leveraging a single unified model development architecture and set of methods for multiple prediction tasks, thereby greatly enhancing medical data model development efficiency and scalability.

The application of patient timelines for generating insights has been established in existing research Jiang et al. [2023], Steinberg et al. [2021], Li et al. [2023], Savcicens et al. [2024], Bornet et al. [2023], as has the implementation of foundation models Moor et al. [2023]. Our methodology sets itself apart by integrating a zero-shot capability, obviating the need for additional training beyond the initial model. The design of ETHOS accommodates various approaches to inference, including few-shot predictions, although this necessitates fine-tuning for specific downstream tasks. Notably, the zero-shot prediction methodology introduces capabilities absent in few-shot prediction. To forecast future outcomes, ETHOS generates multiple health timelines representing possible future scenarios. This functionality exploits the model’s capacity to explore and evaluate potential future events, thereby potentially estimating uncertainties. Future work will undoubtedly concentrate on refining this aspect of ETHOS. Moreover, ETHOS is specifically engineered to produce causal predictions in the form of future timelines, ensuring they are inherently comprehensible to human users. This is achieved through a novel tokenization process for medical data, a distinctive feature of our work.

## Zero Shot Health Trajectory Prediction Using Transformer

The generation of multiple scenarios using the zero-shot approach places significant demands on time and computational resources. We estimated the inference time based on the average duration required to generate 1,000 tokens. On a single Nvidia A100 GPU, this process took approximately 15 seconds. Given that computations are executed in batches and are thus highly parallelizable, we anticipate that in a potential production environment, response times could vary between 1 to 30 seconds. This variation is contingent upon the complexity of the downstream task at hand.

Another highly distinctive capability of ETHOS is the potential to generate individualized care-integrated PHT-based projected healthcare expenditures. This capability is exemplified through the prediction of Diagnosis-Related Group (DRG) codes but is not limited to this application. Specifically, ETHOS can model future PHTs at critical decision-making junctures in patient care. For instance, ETHOS can model outcomes for administering either drug A or B, considering the patient's unique conditions (such as sex, age, race, gender, income, etc.) to determine which path might yield better clinical and cost outcomes. In this regard, ETHOS has the potential to revolutionize medical decision-analytic modeling science by incorporating a level of personalization previously unavailable in conventional decision-analytic models. This has the potential to enhance clinical decision-making and incorporate individualized real-time quantitatively robust value-based care policies into clinical care. This is a potentially transformative change, radically unlike current evidence-based medicine practices, which rely on high-quality data obtained from and averaged across patient populations Zack et al. [2024], Obermeyer et al. [2019], Abid et al. [2021].

In designing ETHOS, we have considered explainability, fairness, and transparency. These are vital aspects of our ongoing research. In future work, we plan to implement and test advanced visualization attention layers of the transformer Vig [2019] to gain insights into the model's reasoning process. Additionally, a dedicated interface for decision-making is envisaged further to enhance the usability of ETHOS in clinical settings.

Envisioning the development of a robust AI method that offers fully personalized advice on a wide range of medical questions necessitates learning from an extensive dataset of patients. Such a model must assimilate as much data as possible and be adaptable to a vast array of medical tasks. ETHOS represents a significant stride in this direction. Built on a transformer architecture, it is inherently scalable and, as a zero-shot learner, is versatile enough to address numerous key medical prediction tasks without task-specific training. Currently, ETHOS does not incorporate various types of critical information, including clinical and discharge notes, medical imaging and pathology images, genetic data, socioeconomic factors, lifestyle considerations, and monitoring signals. Nonetheless, the conceptual framework for incorporating these diverse data types is relatively straightforward. This can be done by leveraging the encoder and cross-attention mechanisms inherent in the transformer architecture; we anticipate the potential for integrating a nearly limitless amount of information during training. This expansion of ETHOS's capabilities forms the cornerstone of our future work, promising to enhance its applicability and efficacy in personalized medical advice and diagnostics.

We aim to modify further and train ETHOS to apply it across diverse data sources. This capability is currently hindered by variations in data collection methodologies, disparities in data quality, and the presence or absence of certain data types across different sources. Additionally, non-overlapping populations present significant challenges, rendering ETHOS not yet generalizable. To mitigate some of these compatibility issues, we propose the development of a universal tokenization format McDermott et al. [2023]. While this approach may resolve certain discrepancies, it does not address all underlying compatibility concerns. The ultimate solution, we believe, lies in a system capable of transforming tokenized data from one healthcare system to another, akin to text translation between languages. Specifically, for ETHOS, this would mean converting the patient journey, as encapsulated by the PHT, from one system's format to another. This conversion would not only facilitate a consistent and unified representation of patient histories across different systems but also offer insights into the operational nuances of these systems. Pursuing such a translation strategy represents a vital direction for our future research endeavors, alongside evaluating the methodologies introduced in this paper through analysis of prospectively collected data.

ETHOS and LLMs such as GPT-4o, Claude 3 Opus, and Gemini 1.5 Ultra, although built upon similar AI principles, serve different purposes and exhibit distinct capabilities. ETHOS is specifically designed to predict fPHTs through explicit modeling of quantitative values and temporal sequences. This approach allows ETHOS to leverage structured patient data to generate predictions. In contrast, LLMs are general-purpose models optimized for tasks involving knowledge integration, reasoning, and interactive conversation. They do not explicitly model quantitative values and time sequences, which are important for accurate clinical decision support. Studies, such as those by Hager et al. [2024] and Wang and Zhao [2024], highlight the limitations of LLMs in handling temporal information and decision support tasks, emphasizing the potential need for specialized models like ETHOS. There is a potential of ETHOS to be used in conjunction with LLMs through retrieval-augmented generation (RAG) mechanisms, offering a promising direction for future AI applications in healthcare. In supplementary material, we present a comparison in predictive performance of ETHOS and LLM (GPT-4o). Furthermore, while LLMs excel in processing vast amounts of unstructured text, their computational performance in generating detailed and contextually accurate patient predictions remains suboptimal compared to ETHOS because of efficient representation of information in ETHOS tokenized PHTs.

This work has limitations. We utilized the MIMIC dataset, which may be cleaner than many routine clinical datasets. Performance and usability should be tested prospectively in diverse datasets and in real-time. The transformer model in the current version of ETHOS is relatively simple and uses only 2048 PHT tokens for predictions. When token density per time is large, this may not contain sufficient information for optimal performance. Mitigation of the limitation is expected with additional computational infrastructure.

In conclusion, ETHOS presents a promising approach to deriving insights from massive clinical datasets without labor-intensive labeling or distinct model creation for each prediction task. This approach has the potential to significantly lower the costs and complexities associated with AI model development, thereby accelerating the development and implementation of healthcare AI.

## 4 Methods

### 4.1 Data

In this study, the Medical Information Mart for Intensive Care (MIMIC-IV) database served as a data source, providing a rich and comprehensive collection of de-identified health-related information<sup>4</sup>. Managed collaboratively by the Massachusetts Institute of Technology (MIT), Beth Israel Deaconess Medical Center (BIDMC), and Philips Healthcare, MIMIC-IV encompasses detailed records for more than 200,000 patients who were admitted to hospital and critical care units at BIDMC in Boston, Massachusetts, between 2008 and 2019. The following tables from the MIMIC-IV were used: 1) Patients, which contains static information about the patients, such as gender, date of birth, and date of death; 2) Admissions, which holds information about patient admissions to the hospital, including admission and discharge times, as well as information related to the hospital stay; 3) Icestays, which is specifically related to intensive care unit (ICU) stays, including the timings and type of ICU; 4) Labevents, which contains laboratory test results for patients. We used the 200 most frequent tests covering 95% of tests completed; 5) Prescriptions, which holds information on medications prescribed to patients during their stay, with each drug converted to ATC code<sup>1</sup>. We converted GSN codes in MIMIC-IV to ATC codes using conversion tables Bornet et al. [2023]; 6) Procedures which contains information about procedures performed on patients, coded using ICD10-PCS codes; 7) Diagnoses which contains diagnostic information, typically coded using ICD10-CM codes. We converted ICD9 to ICD10-CM if needed using conversion table<sup>2</sup>; 8) Emar, which holds information related to the documentation and administration of medications to patients; 9) Omr with information about measurements taken from a patient, such as blood pressure or BMI; 10) Services with information about the clinical service under which a patient is managed during their hospital stay; 11) drgcodes DRG codes which are a classification system used in the healthcare industry to categorize hospital cases into groups that are expected to have similar hospital resource use; 12) SOFA, taken from the derived tables in MIMIC. The remaining tables were not used in the current ETHOS implementation as they will require additional processing. For example, clinical notes require natural language processing to be converted to meaningful tokenized information.

### 4.2 Patient health timelines (PHTs), tokenization

The core concept behind ETHOS is the Patient Health Timeline (PHT), as depicted in Figure 1. The fundamental component of the PHT is the token, which represents a distinct unit of information occurring within the patient's health timeline. To construct the PHT, we gathered all pertinent data from tables 1 to 12 of the MIMIC-IV database, as detailed in the Data section. We arranged this data chronologically based on timestamps, as shown in Figure 5, into a chronological sequence of health-related events for each patient. These events were timestamped with a floating-point number in 64-bit precision to denote the patient's age at the time of occurrence of the event. Subsequently, events from the MIMIC-IV tables were converted into tokens. Each event was represented by 1 to 7 tokens to encapsulate information about the event, as illustrated in Figure S5a. We crafted this encoding process to ensure each token conveys specific, meaningful information, with examples in Figure S5c-f. A comprehensive list of token encodings within the PHT is available in the supplementary material. The final step of tokenization involved the insertion of time-interval tokens to represent the intervals between events, depicted in Figure 2c. We employed 13 different time-interval tokens to represent the intervals. No interval token was inserted if the duration between tokens was less than 5 minutes. Typically, a single time-interval token was placed between other types of tokens unless the interval exceeded one year. In such cases, multiple 6-month tokens were used to approximate the actual interval. For example, an interval of 1.4 years was represented by three 6-month tokens, while four 6-month tokens represented 1.76 years. One interval-tokens were inserted the exact time of events was dropped from PHTs.

<sup>1</sup><https://www.whocc.no>

<sup>2</sup><https://www.cms.gov/medicare/coding-billing/icd-10-codes>

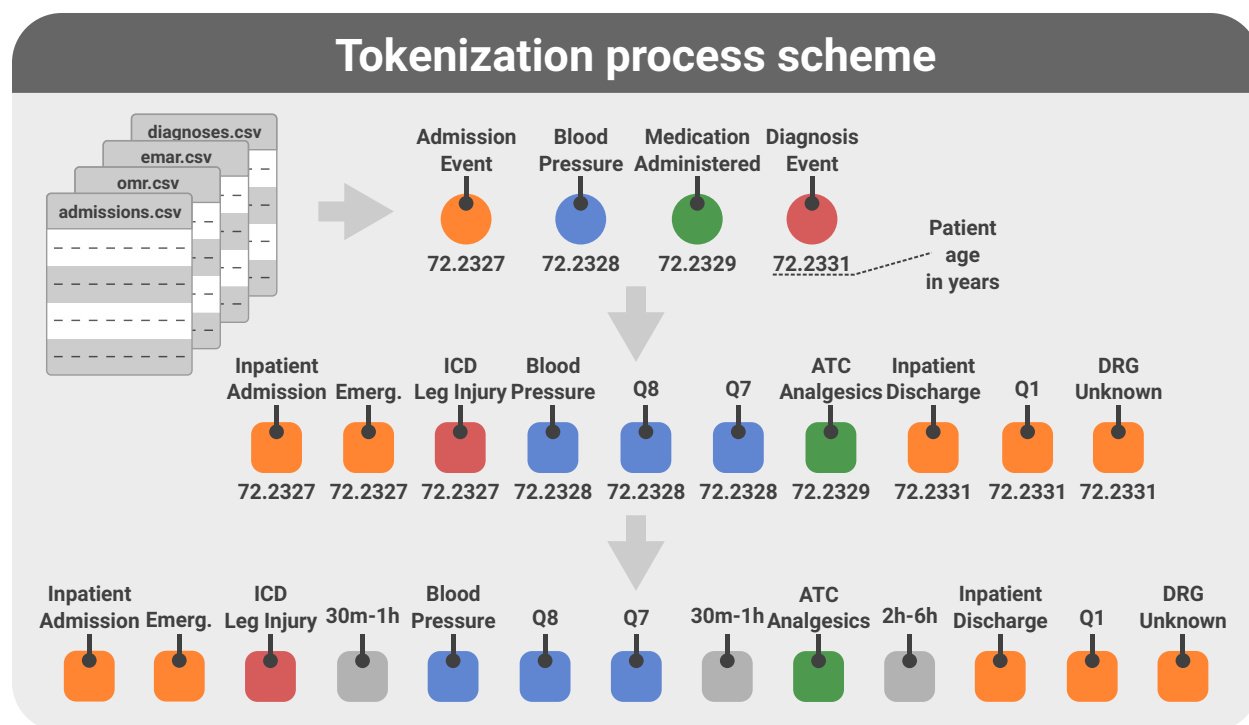

Figure 5: **Stages of PHT Construction and Tokenization in ETHOS** The process begins with assembling a chronological list of events from MIMIC-IV tables. Each entry on the list is time stamped with 64-bit real value only 6 significant digits show for clarity, indicating the patient's age at which the event occurred. Subsequently, list elements are transformed into tokens using ETHOS tokenization scheme. Based on the event's nature, one event can be translated into 1 up to 7 tokens. Each token derived from the same event shares its timestamp. The final step involves representing time gaps between events by inserting time-interval tokens. If the time difference between events is less than 5 minutes—the minimum value represented by the token for the shortest time interval—no token is added. After adding interval-tokens, timestamps are stripped from the timeline.

The patient's age and the commencement date of the PHT were represented using the same token set. We used 20 distinct tokens to denote age intervals such as 0-5 years, 5-10 years, and so forth. For instance, to encode information about a 46-year-old patient with PHT beginning in 1982, we inserted a "45\_50 years" token at the 4th position in the PHT. To signify the year 1982, we used a "15\_20 years" token at the 5th position of the PHT, considering 1970 as the baseline year. We emphasize that age and the commencement of the PHT are encoded in five-year intervals, given that health status typically does not undergo rapid changes with age, making finer granularity unnecessary. However, we plan to scrutinize these assumptions in subsequent research. The token denoting the commencement of the PHT delineates the temporal context of the medical data—identifying whether it corresponds to earlier medical practices (e.g., 1990s), contemporary practices, or periods in between. Using tokens with a precision of five years is done under the premise that technological and methodological progress within the medical field does not advance at a pace that justifies the necessity for time intervals more granular than five-year spans. Pertinent to the MIMIC dataset, the obfuscation of actual dates through uniform random adjustments for each patient—a measure implemented to safeguard privacy—compromises the utility of this temporal information for ETHOS, as it obscures the precise date of the start of PHT. However, the absence of precise reference dates is less critical, given that the entire dataset was collected over a relatively brief period, from 2008 to 2019 (Johnson et al. [2023]).

As mentioned previously, token locations within the timeline are contingent upon the temporal occurrence of events. Nonetheless, certain data elements are temporally invariant, or at least presented as such within the MIMIC-IV database. In our implementation, we designate six static tokens to encapsulate the information encoded in these static data elements. Although, in reality, some of these variables may change over time, they are represented as invariable constants in the MIMIC database. We encoded this information in the six static tokens exactly as recorded in the MIMIC dataset. These include gender, marital status, race, body mass index (BMI), birth date, and the start date of the timeline. While PHTs have the potential to extend to hundreds of thousands of tokens, our current methodology utilizes a maximum of 2048 subsequent tokens within the transformer model context, as elaborated in the "Methods: ETHOS

Training" section. To accommodate invariant data, we substitute the initial six tokens of the 2048-token context with static information tokens, where the sixth token demarcates the temporal juncture of the seventh token, which is the first token of the actual timeline. Although the transformer architecture inherently facilitates the inclusion of static data via its encoder component and cross attention module<sup>3</sup>, we opted for a more streamlined approach as described, deferring the integration of an encoder implementation to future endeavors where more substantial time-invariant data like genetics is used.

Medical encounters yield a plethora of numerical data. We employ a quantile-based tokenization strategy to process continuous numerical values, such as blood pressure readings or cholesterol levels. Specifically, all numerical values are transformed into integers representing the quantile to which each value corresponds. Quantile ranges were determined using the training dataset, where histograms of all numerical values were generated and subsequently divided into quantiles. We chose to utilize ten quantiles, a decision aimed at striking a balance between the need for precise representation of numerical data and the clinical reality that significant changes in health indicators often manifest as relatively large variations, such as shifts of 10 or 20 percent (Figure S4). This rationale underpins our selection of ten quantiles for tokenization.

In our study, Diagnosis-Related Group (DRG) codes for each inpatient stay were utilized, despite the absence of assigned times when they were created in the MIMIC tables. Given that a DRG code is assigned after or during discharge, we positioned it after a trio of tokens representing discharge-related information: the discharge token, a quantile token indicating the length of the hospital stay, and a token specifying the discharge destination (e.g., home). Additionally, we incorporated data from MIMIC regarding the initial SOFA score for ICU patients, placing this token after the patient's admission-to-the-ICU token, along with a token denoting the ICU type. Given that the SOFA score in the dataset ranges from 0 to 23 (with the score of 24 never appearing), we uniformly map scores from 0-23 across 1-10 quantiles. Consequently, in quantile Q1, SOFA scores of 0, 1, and 2 (average of 1) are included, while quantile Q2 encompasses SOFA scores of 3 and 4 (average of 3.5), and this pattern continues accordingly.

ETHOS operates as a causal network. It relies solely on information available up to the time being considered in making predictions. Consequently, to ensure causality, actual values of DRG codes and SOFA scores are not employed during inference; instead, predictions of these values are used. This principle ensures that future-obtained information does not influence the prediction of yet-to-occur events. In essence, if tokens are integrated into the timeline based on their approximate occurrence time, their actual values must not be utilized for inference purposes, or they are placed in the timeline far in the future to ensure they are inserted after they occurred.

For the tokenization of drugs, whether administered or prescribed, we utilized the ATC classification system due to its hierarchical, tree-like structure (Figure S1). Each ATC code, comprising up to seven characters, was encoded using up to three sequential tokens: the first token for the initial three characters, the second for the subsequent character, and the third optional token, for the remaining suffix. Similarly, ICD-10-CM codes were encoded with three tokens: the first representing the first three characters of the code, the next two by the second token, and the final token capturing the code's remaining suffix. For ICD-10-PCS codes, each character in the seven-character code was represented by a distinct token. The rationale behind such tokenization is that the initial characters in those coding schemes denote specific classes of drugs and diseases or procedures, which are interpretable and have distinct meanings which we anticipated to be important for the network's self-attention mechanisms. Looking ahead, our approach, which assigns well-defined meanings to each token, will be crucial for refining attention mechanisms and enhancing the model's explainability. This method ensures that individual tokens contribute significantly to the interpretability of the network's outcomes. For more information on the tokenization process applied to MIMIC data in our analysis, as well as examples of Patient Health Timelines (PHTs), readers are directed to Table S3 and Table S4 where we present real PHTs used in this work with annotations. A summary of all tokenized components of the MIMIC dataset is in Table S2.

### 4.3 ETHOS training

We employ a model inspired by the decoder architecture of the transformer Vaswani et al. [2017], drawing parallels between tokenized text in Natural Language Processing (NLP) and our approach to tokenizing PHTs. We based our model development on Andrej Karpathy's implementation of GPT-2<sup>3</sup>. The design choice slightly varies from the original transformer paper, because instead of using fixed sinusoidal positional encodings, it utilizes learnable position embeddings that are added to the token embeddings at the stage where tokens are converted to their corresponding embeddings. The ETHOS model's training begins by synthesizing a dataset from existing patient records. Each patient's PHT is ended with a "End of timeline" token, and then they are concatenated, creating a single long sequence of tokens for the training. Similarly to generative LLM, ETHOS is trained to predict a single token based on the context of preceding ones. Given the large data scale and model complexity, this phase is resource-intensive similar to methods for

<sup>3</sup><https://github.com/karpathy/nanoGPT>

training used for NLP transformers used in LLMs (Vaswani et al. [2017], Thirunavukarasu et al. [2023]). We estimated that the size of the network training task that we face with ETHOS is similar to GPT-2 Brown et al. [2020], and therefore we used the size of the transformer used in that network as a starting point (details on the hyperparameter search and choice can be seen in Figure S2). We made heuristic adjustments to the size of the network to optimize the value of the loss function. Further details on our training methodology of transformers are provided in Brown et al. [2020] and for our implementation in supplementary material and full complete code published on GitHub <sup>4</sup>.

#### 4.4 Evaluation of Clinical Outcomes and Tasks Using ETHOS

The experiments were chosen so the results can be compared to the work of others in terms of the estimation of inpatient mortality and readmission on MIMIC data. Patients in the MIMIC were randomly divided into training and testing groups, with splits of 90%/10% (Table S1).

The chance of inpatient mortality was assessed at the time of admission for all inpatient stays for patients in the test set unless the discharge day was unknown. This was performed by the generative process that began with the admission token and ended upon generating a discharge or death token, repeating this cycle 20 times. The 'N', representing the number of times a death token was generated first, was divided by 20 to estimate the chance of inpatient mortality. Similarly, the likelihood of ICU mortality was computed for the MIMIC dataset, with an additional experiment conducted where predictions were made starting 24 hours after ICU admission, rather than at the point of ICU admission. In the same simulation, the LOS in the ICU was estimated by aggregating the time-interval tokens generated in the simulated timeline until the discharge token appeared. Instances where the patient died in the ICU during the simulation were excluded from the LOS calculation. We opted for 20 repetitions, yielding 21 unique probability estimators, which were adequate for constructing robust Receiver Operating Characteristic (ROC) curves yielding excellent Gaussian fits (Figure 3). Nevertheless, alternative repetition counts may also be employed.

To calculate the probability of 30-day inpatient readmission, the generation of fPHTs commenced at the discharge token from inpatient stays and ceased upon the appearance of either a new admission or death token or when the cumulative time tokens generated exceeded 30 days. The simulation was repeated 20 times. The probability of 30-day readmission was then derived as  $M/20$ , where 'M' is the count of terminations occurring because of patient new admission tokens across the 20 repetitions.

In our approach, tasks are accomplished by simulating future patient health timelines. Yet, ETHOS offers additional methods for deriving insights, two of which we illustrate here. For instance, in the construction of PHTs following each ICU admission, a sequence is created starting with a token that identifies the type of ICU, followed by a SOFA score token, and then by a Q token that signifies the actual SOFA score on the first day. We predict the SOFA score using SOFA Q node probabilities as generated by ETHOS and the mean SOFA score per quantile as assigned during tokenization (Figure 4a).

The exact timing of the 1-day SOFA score assessment is not specified in the dataset, leading to a potential causality issue by inserting the SOFA score immediately after admission, as it relies on data acquired subsequently. During the model's training phase, ETHOS permits this apparent causality violation. However, such true values of 1-day SOFA scores, not available at the moment of ICU admission, are not used for simulating future timelines during inference to prevent causality violation during inference. Instead, these scores are predicted from prior information, as demonstrated in our study. This feature of ETHOS enables the inclusion of information with indeterminate timing.

Another distinctive inference capability facilitated by ETHOS is DRG class estimation. As illustrated in Figure 4c, the token denoting the DRG class is consistently positioned following the discharge token and a Q token specifying the length of hospital stay. With 771 unique tokens available for this purpose, we infer the actual class by generating a probability array in the final network layer of the transformer for the DRG token. This array is then utilized to predict the classification's top-1 and top-2 accuracy metrics.

#### 4.5 Statistical Analysis

The performance of classification algorithms of binary tasks was assessed using Receiver Operating Curve Analysis (ROC). The ROC curves were fitted to experimental points using Gaussian models with unequal variances for binary hypotheses (code provided). Values of Areas Under Curves (AUCs) and 95% confidence intervals (CI) were calculated using bootstrapping (code provided). For multiclass classification (DRG task), we used top-1 and top-2 accuracy. We used mean absolute error (MEA) for the regression tasks to indicate prediction fidelity with 95% confidence intervals estimated using bootstrapping. Python numpy and scikit-learn were used.

<sup>4</sup><https://github.com/ipolharvard/ethos-paper>

## 4.6 Comparison of ETHOS to existing methods

Employing the data segmentation as detailed in Table S1, we evaluated traditional algorithms for predicting 30-day hospital readmission rates and juxtaposed these outcomes with those obtained via ETHOS. The features used in Figure S6 were culled from data accrued during the patient’s hospitalization, adhering to the feature derivation methodology outlined by Tang et al. [2023]. Attempting to apply the algorithm devised by the authors to our dataset presented challenges, notably due to the Graph Neural Network (GNN) implementation by Tang et al., which necessitates the computation of a similarity score for each pair of admissions. Given the significantly larger volume of admissions in our dataset—approximately 400,000, in stark contrast to the 14,500 reported by Tang et al.—this task proved impractical on a compute node with 2TB of RAM, defying all efforts to achieve it within a reasonable timeframe. Consequently, we limited our application to the data preprocessing and feature extraction segments of Tang et al.’s methodology. The adapted and modified code from Tang et al.’s repository, which we cloned for feature extraction, is accessible on GitHub<sup>5</sup>. For models unsupportive of temporal sequence analysis, such as Logistic Regression and XGBoost, we modified the approach to handle time-varying features by consolidating them over time. This entailed distilling the minimum, first quartile, median, third quartile, and maximum values of dynamically changing features. Furthermore, we integrated the day of admission as a unique feature to retain an element of temporal dimension within the dataset. In Figure S6 ETHOS was compared to one of the leading proprietary LLM models - GPT-4o in two temperature variants: 0.3 and 0.5. We constructed a comprehensive prompt that directs the model to analyze a timeline of 2048 tokens and calculate the probability of patient readmission for 2000 cases from the test set. This prompt is structured into four distinct parts: task instructions, a basic patient description corresponding to ETHOS’s static information, PHT and a detailed description of subgroups of tokens and their identification. The complete codebase for this experiment including the prompt design is accessible on GitHub<sup>6</sup>. ETHOS significantly outperforms both variants of GPT-4o for the same subset of testing samples.

## Additional information

**Data Availability** The MIMIC-IV dataset is publicly available at <https://physionet.org/content/mimiciv/2.2>.

**Code Availability** The code, ETHOS model weights used for all inferences, results of inferences, scripts to generate numerical results for all aspects of this study for the MIMIC-IV dataset are made publicly available at <https://github.com/ipolharvard/ethos-paper>. In our experiments, we used Python 3.10, and the following open-source libraries: torch=2.3.0, joblib=1.4.2, tqdm=4.66.4, colorlog=6.8.2, h5py=3.11.0, pandas=2.2.2, numpy=1.26.4, pyarrow=16.1.0, click=8.1.7.

**Author Contribution** AS and PR conceptualized the work. AS, PR, YJ, AES designed the study. PR, AS performed the coding and the experiments. YJ, AS conducted the literature search. DB, AES, QL, JW provided advisory support for the project. PR and AS prepared the initial draft of the manuscript, with all authors actively participating in the refinement and finalization of the manuscript through comprehensive review and contributions. AS supervised the project.

**Competing Interests** YJ is currently also affiliated with Verily life science, SSF, CA. The other authors declare no competing interests.

## References

- Eric C. Schneider and Reginald D. Williams II. Mirror, Mirror 2021: Reflecting Poorly, August 2021. URL <https://www.commonwealthfund.org/publications/fund-reports/2021/aug/mirror-mirror-2021-reflecting-poorly>.
- David W Bates, Hsiang-Yin Cheng, NT Cheung, Rita Jew, Fraz Mir, Robyn Tamblyn, and Yu-Chuan Li. ‘Improving smart medication management’: an online expert discussion. *BMJ Health & Care Informatics*, 29(1):e100540, April 2022. ISSN 2632-1009. doi:10.1136/bmjhci-2021-100540. URL <https://www.ncbi.nlm.nih.gov/pmc/articles/PMC9047882/>.
- Ashish Vaswani, Noam Shazeer, Niki Parmar, Jakob Uszkoreit, Llion Jones, Aidan N. Gomez, Łukasz Kaiser, and Illia Polosukhin. Attention is all you need. In *Proceedings of the 31st International Conference on Neural Information*

<sup>5</sup><https://github.com/ipolharvard/readmit-stggn>

<sup>6</sup>[https://github.com/ipolharvard/ethos-paper/blob/master/notebooks/llm\\_readmission\\_task.ipynb](https://github.com/ipolharvard/ethos-paper/blob/master/notebooks/llm_readmission_task.ipynb)

- Processing Systems*, NIPS'17, pages 6000–6010, Red Hook, NY, USA, December 2017. Curran Associates Inc. ISBN 978-1-5108-6096-4.
- Alistair E. W. Johnson, Lucas Bulgarelli, Lu Shen, Alvin Gayles, Ayad Shammout, Steven Horng, Tom J. Pollard, Sicheng Hao, Benjamin Moody, Brian Gow, Li-wei H. Lehman, Leo A. Celi, and Roger G. Mark. MIMIC-IV, a freely accessible electronic health record dataset. *Scientific Data*, 10(1):1, January 2023. ISSN 2052-4463. doi:10.1038/s41597-022-01899-x. URL <https://www.nature.com/articles/s41597-022-01899-x>. Publisher: Nature Publishing Group.
- Eamon P. Raith, Andrew A. Udy, Michael Bailey, Steven McGloughlin, Christopher MacIsaac, Rinaldo Bellomo, David V. Pilcher, and for the Australian and New Zealand Intensive Care Society (ANZICS) Centre for Outcomes and Resource Evaluation (CORE). Prognostic Accuracy of the SOFA Score, SIRS Criteria, and qSOFA Score for In-Hospital Mortality Among Adults With Suspected Infection Admitted to the Intensive Care Unit. *JAMA*, 317(3):290–300, January 2017. ISSN 0098-7484. doi:10.1001/jama.2016.20328. URL <https://doi.org/10.1001/jama.2016.20328>.
- Michael Moor, Oishi Banerjee, Zahra Shakeri Hossein Abad, Harlan M. Krumholz, Jure Leskovec, Eric J. Topol, and Pranav Rajpurkar. Foundation models for generalist medical artificial intelligence. *Nature*, 616(7956):259–265, April 2023. ISSN 1476-4687. doi:10.1038/s41586-023-05881-4. URL <https://www.nature.com/articles/s41586-023-05881-4>. Publisher: Nature Publishing Group.
- Tom B. Brown, Benjamin Mann, Nick Ryder, Melanie Subbiah, Jared Kaplan, Prafulla Dhariwal, Arvind Neelakantan, Pranav Shyam, Girish Sastry, Amanda Askell, Sandhini Agarwal, Ariel Herbert-Voss, Gretchen Krueger, Tom Henighan, Rewon Child, Aditya Ramesh, Daniel M. Ziegler, Jeffrey Wu, Clemens Winter, Christopher Hesse, Mark Chen, Eric Sigler, Mateusz Litwin, Scott Gray, Benjamin Chess, Jack Clark, Christopher Berner, Sam McCandlish, Alec Radford, Ilya Sutskever, and Dario Amodei. Language Models are Few-Shot Learners, July 2020. URL <http://arxiv.org/abs/2005.14165>. arXiv:2005.14165 [cs].
- Michael Wornow, Yizhe Xu, Rahul Thapa, Birju Patel, Ethan Steinberg, Scott Fleming, Michael A. Pfeffer, Jason Fries, and Nigam H. Shah. The shaky foundations of large language models and foundation models for electronic health records. *npj Digital Medicine*, 6(1):1–10, July 2023. ISSN 2398-6352. doi:10.1038/s41746-023-00879-8. URL <https://www.nature.com/articles/s41746-023-00879-8>. Publisher: Nature Publishing Group.
- Travis Zack, Eric Lehman, Mirac Suzgun, Jorge A. Rodriguez, Leo Anthony Celi, Judy Gichoya, Dan Jurafsky, Peter Szolovits, David W. Bates, Raja-Elie E. Abdunour, Atul J. Butte, and Emily Alsentzer. Assessing the potential of GPT-4 to perpetuate racial and gender biases in health care: a model evaluation study. *The Lancet Digital Health*, 6(1):e12–e22, January 2024. ISSN 2589-7500. doi:10.1016/S2589-7500(23)00225-X. URL [https://www.thelancet.com/journals/landig/article/PIIS2589-7500\(23\)00225-X/fulltext](https://www.thelancet.com/journals/landig/article/PIIS2589-7500(23)00225-X/fulltext). Publisher: Elsevier.
- Fei Li, Yonghao Jin, Weisong Liu, Bhanu Pratap Singh Rawat, Pengshan Cai, and Hong Yu. Fine-Tuning Bidirectional Encoder Representations From Transformers (BERT)-Based Models on Large-Scale Electronic Health Record Notes: An Empirical Study. *JMIR medical informatics*, 7(3):e14830, September 2019. ISSN 2291-9694. doi:10.2196/14830.
- Lavender Yao Jiang, Xujin Chris Liu, Nima Pour Nejatian, Mustafa Nasir-Moin, Duo Wang, Anas Abidin, Kevin Eaton, Howard Antony Riina, Ilya Laufer, Paawan Punjabi, Madeline Miceli, Nora C. Kim, Cordelia Orillac, Zane Schnurman, Christopher Livia, Hannah Weiss, David Kurland, Sean Neifert, Yosef Dastagirzada, Douglas Kondziolka, Alexander T. M. Cheung, Grace Yang, Ming Cao, Mona Flores, Anthony B. Costa, Yindalon Aphinyanaphongs, Kyunghyun Cho, and Eric Karl Oermann. Health system-scale language models are all-purpose prediction engines. *Nature*, 619(7969):357–362, July 2023. ISSN 1476-4687. doi:10.1038/s41586-023-06160-y. URL <https://www.nature.com/articles/s41586-023-06160-y>. Publisher: Nature Publishing Group.
- Hanyin Wang, Chufan Gao, Christopher Dantona, Bryan Hull, and Jimeng Sun. DRG-LLaMA : tuning LLaMA model to predict diagnosis-related group for hospitalized patients. *npj Digital Medicine*, 7(1):1–9, January 2024. ISSN 2398-6352. doi:10.1038/s41746-023-00989-3. URL <https://www.nature.com/articles/s41746-023-00989-3>. Publisher: Nature Publishing Group.
- Ethan Steinberg, Ken Jung, Jason A. Fries, Conor K. Corbin, Stephen R. Pfohl, and Nigam H. Shah. Language Models Are An Effective Representation Learning Technique For Electronic Health Record Data. *Journal of biomedical informatics*, 113:103637, January 2021. ISSN 1532-0464. doi:10.1016/j.jbi.2020.103637. URL <https://www.ncbi.nlm.nih.gov/pmc/articles/PMC7863633/>.
- Yikuan Li, Mohammad Mamouei, Gholamreza Salimi-Khorshidi, Shishir Rao, Abdelaali Hassaine, Dexter Canoy, Thomas Lukasiewicz, and Kazem Rahimi. Hi-BEHT: Hierarchical Transformer-Based Model for Accurate Prediction of Clinical Events Using Multimodal Longitudinal Electronic Health Records. *IEEE journal of biomedical and health informatics*, 27(2):1106–1117, February 2023. ISSN 2168-2208. doi:10.1109/JBHI.2022.3224727.

# Zero Shot Health Trajectory Prediction Using Transformer

- Germans Savcicens, Tina Eliassi-Rad, Lars Kai Hansen, Laust Hvas Mortensen, Lau Lilleholt, Anna Rogers, Ingo Zettler, and Sune Lehmann. Using sequences of life-events to predict human lives. *Nature Computational Science*, 4 (1):43–56, January 2024. ISSN 2662-8457. doi:10.1038/s43588-023-00573-5. URL <https://www.nature.com/articles/s43588-023-00573-5>. Publisher: Nature Publishing Group.
- Ke Pang, Liang Li, Wen Ouyang, Xing Liu, and Yongzhong Tang. Establishment of ICU Mortality Risk Prediction Models with Machine Learning Algorithm Using MIMIC-IV Database. *Diagnostics*, 12(5):1068, April 2022. ISSN 2075-4418. doi:10.3390/diagnostics12051068. URL <https://www.ncbi.nlm.nih.gov/pmc/articles/PMC9139972/>.
- Junde Chen, Trudi Di Qi, Jacqueline Vu, and Yuxin Wen. A deep learning approach for inpatient length of stay and mortality prediction. *Journal of Biomedical Informatics*, 147:104526, November 2023. ISSN 1532-0464. doi:10.1016/j.jbi.2023.104526. URL <https://www.sciencedirect.com/science/article/pii/S1532046423002472>.
- Xiaobin Pan, Jinbao Xie, Lihui Zhang, Xincal Wang, Shujuan Zhang, Yingfeng Zhuang, Xingsheng Lin, Songjing Shi, Songchang Shi, and Wei Lin. Evaluate prognostic accuracy of SOFA component score for mortality among adults with sepsis by machine learning method. *BMC Infectious Diseases*, 23(1):76, February 2023. ISSN 1471-2334. doi:10.1186/s12879-023-08045-x. URL <https://doi.org/10.1186/s12879-023-08045-x>.
- Ricardo M. S. Carvalho, Daniela Oliveira, and Catia Pesquita. Knowledge Graph Embeddings for ICU readmission prediction. *BMC medical informatics and decision making*, 23(1):12, January 2023. ISSN 1472-6947. doi:10.1186/s12911-022-02070-7.
- Yu-Wei Lin, Yuqian Zhou, Faraz Faghri, Michael J. Shaw, and Roy H. Campbell. Analysis and prediction of unplanned intensive care unit readmission using recurrent neural networks with long short-term memory. *PLOS ONE*, 14(7): e0218942, July 2019. ISSN 1932-6203. doi:10.1371/journal.pone.0218942. URL <https://journals.plos.org/plosone/article?id=10.1371/journal.pone.0218942>. Publisher: Public Library of Science.
- Jinfeng Miao, Chengchao Zuo, Huan Cao, Zhongya Gu, Yaqi Huang, Yu Song, and Furong Wang. Predicting ICU readmission risks in intracerebral hemorrhage patients: Insights from machine learning models using MIMIC databases. *Journal of the Neurological Sciences*, 456:122849, January 2024. ISSN 0022-510X. doi:10.1016/j.jns.2023.122849. URL <https://www.sciencedirect.com/science/article/pii/S0022510X23023110>.
- Siya Tang, Amara Tariq, Jared A. Dunnmon, Umesh Sharma, Praneetha Elugunti, Daniel L. Rubin, Bhavik N. Patel, and Imon Banerjee. Predicting 30-Day All-Cause Hospital Readmission Using Multimodal Spatiotemporal Graph Neural Networks. *IEEE Journal of Biomedical and Health Informatics*, 27(4):2071–2082, April 2023. ISSN 2168-2208. doi:10.1109/JBHI.2023.3236888. URL <https://ieeexplore.ieee.org/document/10016722>. Conference Name: IEEE Journal of Biomedical and Health Informatics.
- Lilian Minne, Ameen Abu-Hanna, and Evert de Jonge. Evaluation of SOFA-based models for predicting mortality in the ICU: A systematic review. *Critical Care*, 12(6):R161, 2008. ISSN 1364-8535. doi:10.1186/cc7160. URL <https://www.ncbi.nlm.nih.gov/pmc/articles/PMC2646326/>.
- Tianqi Chen and Carlos Guestrin. XGBoost: A Scalable Tree Boosting System. In *Proceedings of the 22nd ACM SIGKDD International Conference on Knowledge Discovery and Data Mining*, KDD '16, pages 785–794, New York, NY, USA, August 2016. Association for Computing Machinery. ISBN 978-1-4503-4232-2. doi:10.1145/2939672.2939785. URL <https://doi.org/10.1145/2939672.2939785>.
- Alban Bornet, Dimitrios Proios, Anthony Yazdani, Fernando Jaume-Santero, Guy Haller, Edward Choi, and Douglas Teodoro. Comparing neural language models for medical concept representation and patient trajectory prediction, June 2023. URL <https://www.medrxiv.org/content/10.1101/2023.06.01.23290824v1>. Pages: 2023.06.01.23290824.
- Ziad Obermeyer, Brian Powers, Christine Vogeli, and Sendhil Mullainathan. Dissecting racial bias in an algorithm used to manage the health of populations. *Science*, 366(6464):447–453, October 2019. doi:10.1126/science.aax2342. URL <https://www.science.org/doi/10.1126/science.aax2342>. Publisher: American Association for the Advancement of Science.
- Abubakar Abid, Maheen Farooqi, and James Zou. Large language models associate Muslims with violence. *Nature Machine Intelligence*, 3(6):461–463, June 2021. ISSN 2522-5839. doi:10.1038/s42256-021-00359-2. URL <https://www.nature.com/articles/s42256-021-00359-2>. Publisher: Nature Publishing Group.
- Jesse Vig. A Multiscale Visualization of Attention in the Transformer Model. In Marta R. Costa-jussà and Enrique Alfonseca, editors, *Proceedings of the 57th Annual Meeting of the Association for Computational Linguistics: System Demonstrations*, pages 37–42, Florence, Italy, July 2019. Association for Computational Linguistics. doi:10.18653/v1/P19-3007. URL <https://aclanthology.org/P19-3007>.

## Zero Shot Health Trajectory Prediction Using Transformer

Matthew B. A. McDermott, Bret Nestor, Peniel Argaw, and Isaac Kohane. Event Stream GPT: A Data Pre-processing and Modeling Library for Generative, Pre-trained Transformers over Continuous-time Sequences of Complex Events, June 2023. URL <http://arxiv.org/abs/2306.11547>. arXiv:2306.11547 [cs].

Paul Hager, Friederike Jungmann, Robbie Holland, Kunal Bhagat, Inga Hubrecht, Manuel Knauer, Jakob Vielhauer, Marcus Makowski, Rickmer Braren, Georgios Kaissis, and Daniel Rueckert. Evaluation and mitigation of the limitations of large language models in clinical decision-making. *Nature Medicine*, pages 1–10, July 2024. ISSN 1546-170X. doi:10.1038/s41591-024-03097-1. URL <https://www.nature.com/articles/s41591-024-03097-1>. Publisher: Nature Publishing Group.

Yuqing Wang and Yun Zhao. TRAM: Benchmarking Temporal Reasoning for Large Language Models, May 2024. URL <http://arxiv.org/abs/2310.00835>. arXiv:2310.00835 [cs].

Arun James Thirunavukarasu, Darren Shu Jeng Ting, Kabilan Elangovan, Laura Gutierrez, Ting Fang Tan, and Daniel Shu Wei Ting. Large language models in medicine. *Nature Medicine*, 29(8):1930–1940, August 2023. ISSN 1546-170X. doi:10.1038/s41591-023-02448-8. URL <https://www.nature.com/articles/s41591-023-02448-8>. Publisher: Nature Publishing Group.

## Supplementary Information

| Characteristics               | Train/Validation | Test          | Total         |
|-------------------------------|------------------|---------------|---------------|
| Patient number                | 241,015          | 26,758        | 267,773       |
| <b>Age, years, mean (std)</b> | 50.27 (20.76)    | 50.15 (20.80) | 50.25 (20.77) |
| <b>Gender</b>                 |                  |               |               |
| Female                        | 130,115          | 14,473        | 144,588       |
| Male                          | 110,900          | 12,285        | 123,185       |
| <b>Race</b>                   |                  |               |               |
| White                         | 109,274          | 12,090        | 121,364       |
| Unknown                       | 87,420           | 9,724         | 97,144        |
| Black                         | 21,048           | 2,361         | 23,409        |
| Hispanic                      | 8,991            | 1,014         | 10,005        |
| Other                         | 7,506            | 823           | 8,329         |
| Asian                         | 6,776            | 746           | 7,522         |
| <b>Marital Status</b>         |                  |               |               |
| Unknown                       | 84,533           | 9,369         | 93,902        |
| Married                       | 70,297           | 7,649         | 77,946        |
| Single                        | 60,822           | 6,910         | 67,732        |
| Widowed                       | 15,068           | 1,719         | 16,787        |
| Divorced                      | 10,295           | 1,111         | 11,406        |

Table S1: **Demographic characteristics of the dataset.** The characteristics are reported at the time of the first hospital admission and used by ETHOS.

## ATC code: A10BA02

|         |                                                           |
|---------|-----------------------------------------------------------|
| A       | Alimentary tract and metabolism (level 1, anatomical)     |
| A10     | Used in diabetes (level 2, therapeutic)                   |
| A10B    | Glucose lowering, not insulins (level 3, pharmacological) |
| A10BA   | Biguanides (level 4, chemical subgroup)                   |
| A10BA02 | Metformin (level 5, chemical substance)                   |

## ICD10-CM: E11.65

|        |                                              |
|--------|----------------------------------------------|
| E11    | Type 2 diabetes mellitus                     |
| E11.65 | Type 2 diabetes mellitus with hyperglycemia. |

## ICD10-PCS: 0FB03ZX

The percutaneous excision of a portion of the liver without any device

|          |                                                                                                         |
|----------|---------------------------------------------------------------------------------------------------------|
| 0        | Section (Medical and Surgical)                                                                          |
| 0FB      | Body System (Hepatobiliary System and Pancreas)                                                         |
| 0FB0     | Root Operation (Excision, defined as cutting out or off, without replacement, a portion of a body part) |
| 0FB03    | Body Part (Liver)                                                                                       |
| 0FB03Z   | Approach (Percutaneous)                                                                                 |
| 0FB03ZX  | Device (No Device)                                                                                      |
| 0FB03ZX0 | Qualifier (No Qualifier)                                                                                |

Figure S1: **Tokenization schema of ATC, ICD10-CM, and ICD10-PCS.** Different colors correspond to parts of the codes encoded by different tokens in examples below.

# Zero Shot Health Trajectory Prediction Using Transformer

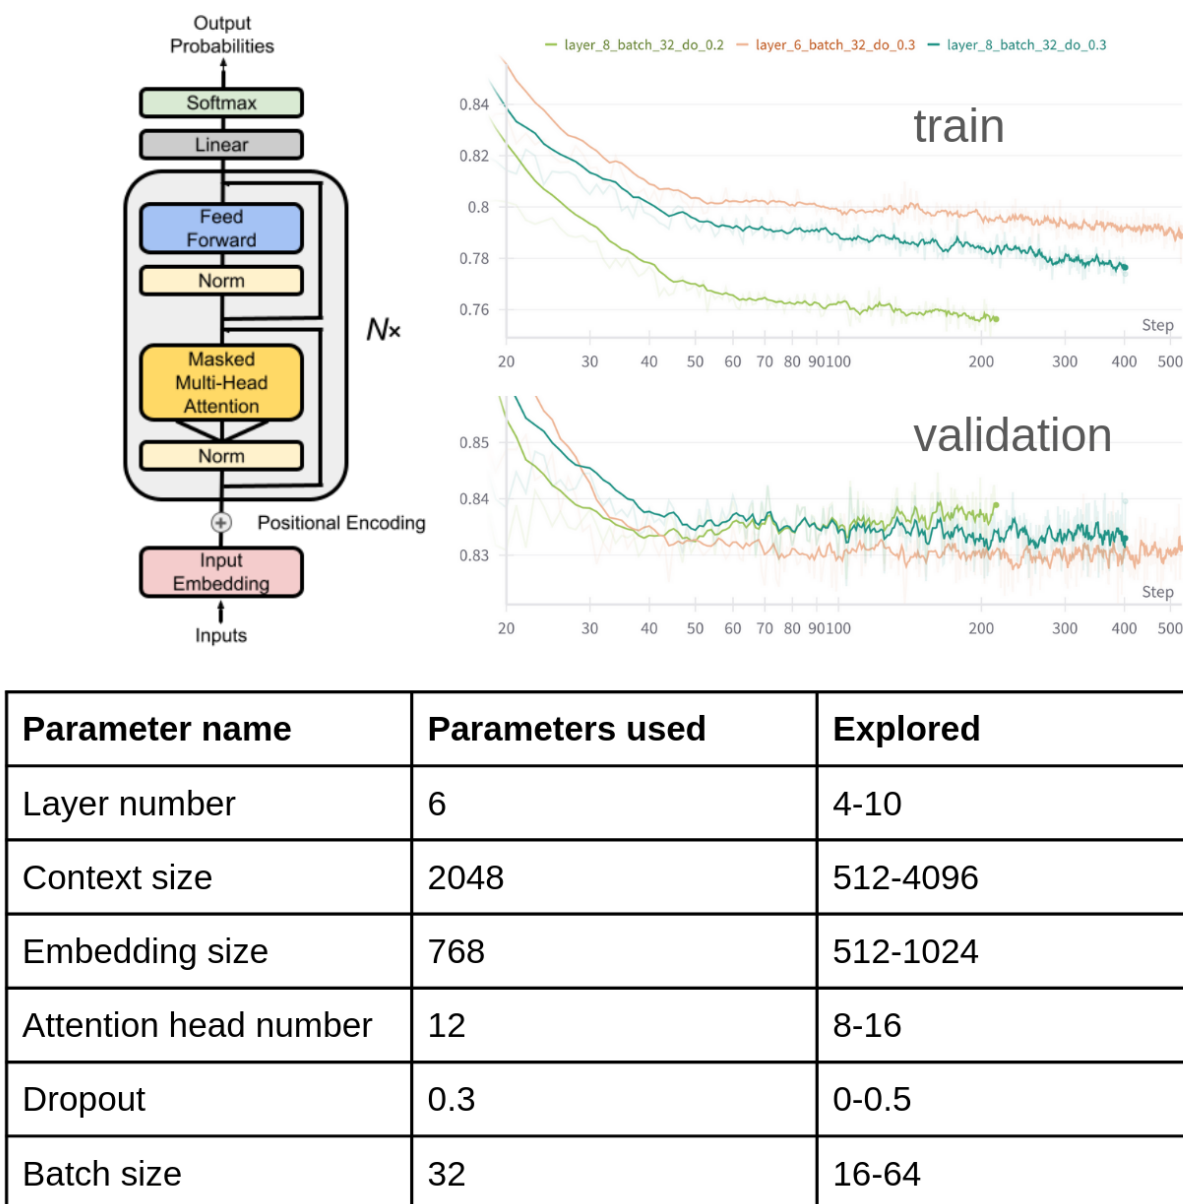

Figure S2: **Architecture of the Transformer Decoder Model employed in ETHOS.** We closely mirrored the original decoder design by Vaswani et al. [2017]. This iteration of the model was initially sized in alignment with GPT-2 (Brown et al. [2020]), reflecting a comparable scale of training data. Included are select training traces and a detailed account of the operational model, complete with parameter specifications outlined in the accompanying table.

# Zero Shot Health Trajectory Prediction Using Transformer

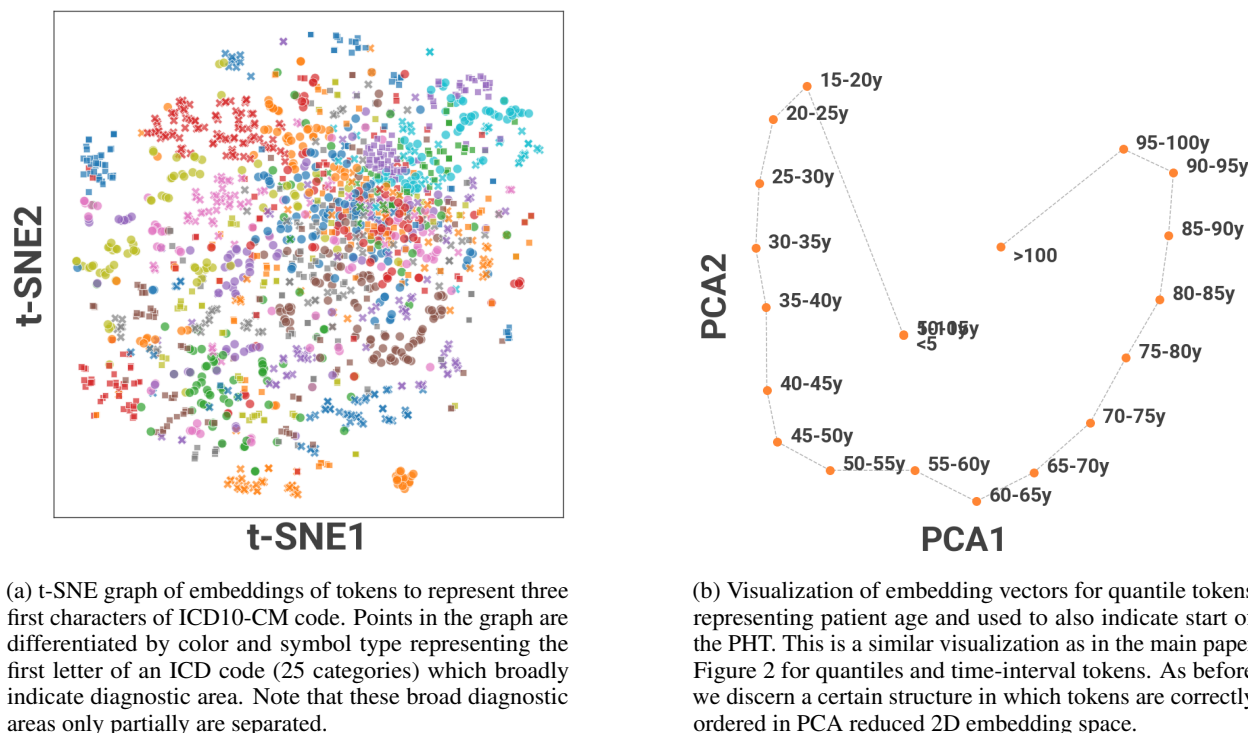

Figure S3: Learned token embeddings projected into 2 dimensions.

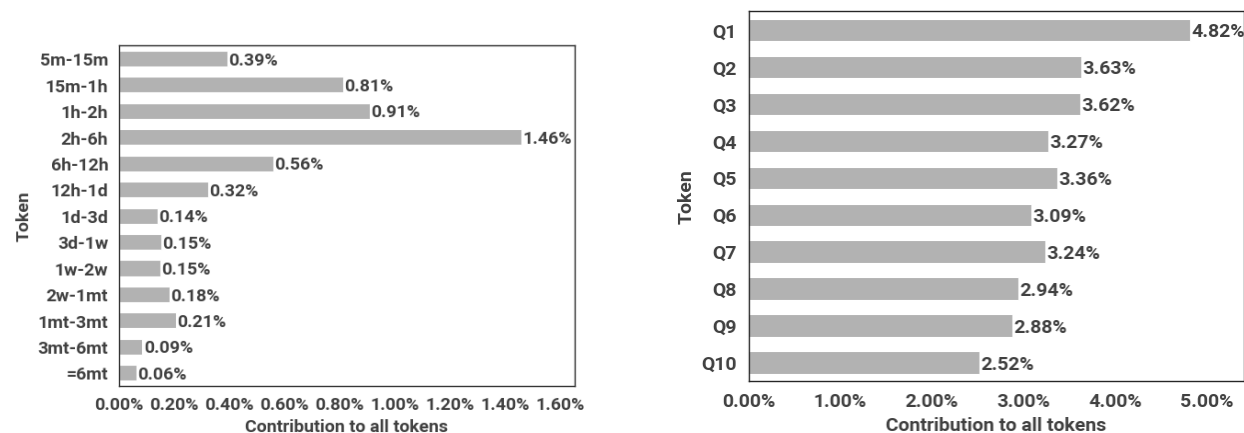

Figure S4: The variability in the representation of time intervals and quantile tokens within the tokenized dataset. The longest used interval was 6 months as it was relatively rare to have intervals much longer than that. Notably, for tests with discrete ordered outputs, a reduced number of quantiles was employed, resulting in a non-uniform frequency distribution across these specific categories.

# Zero Shot Health Trajectory Prediction Using Transformer

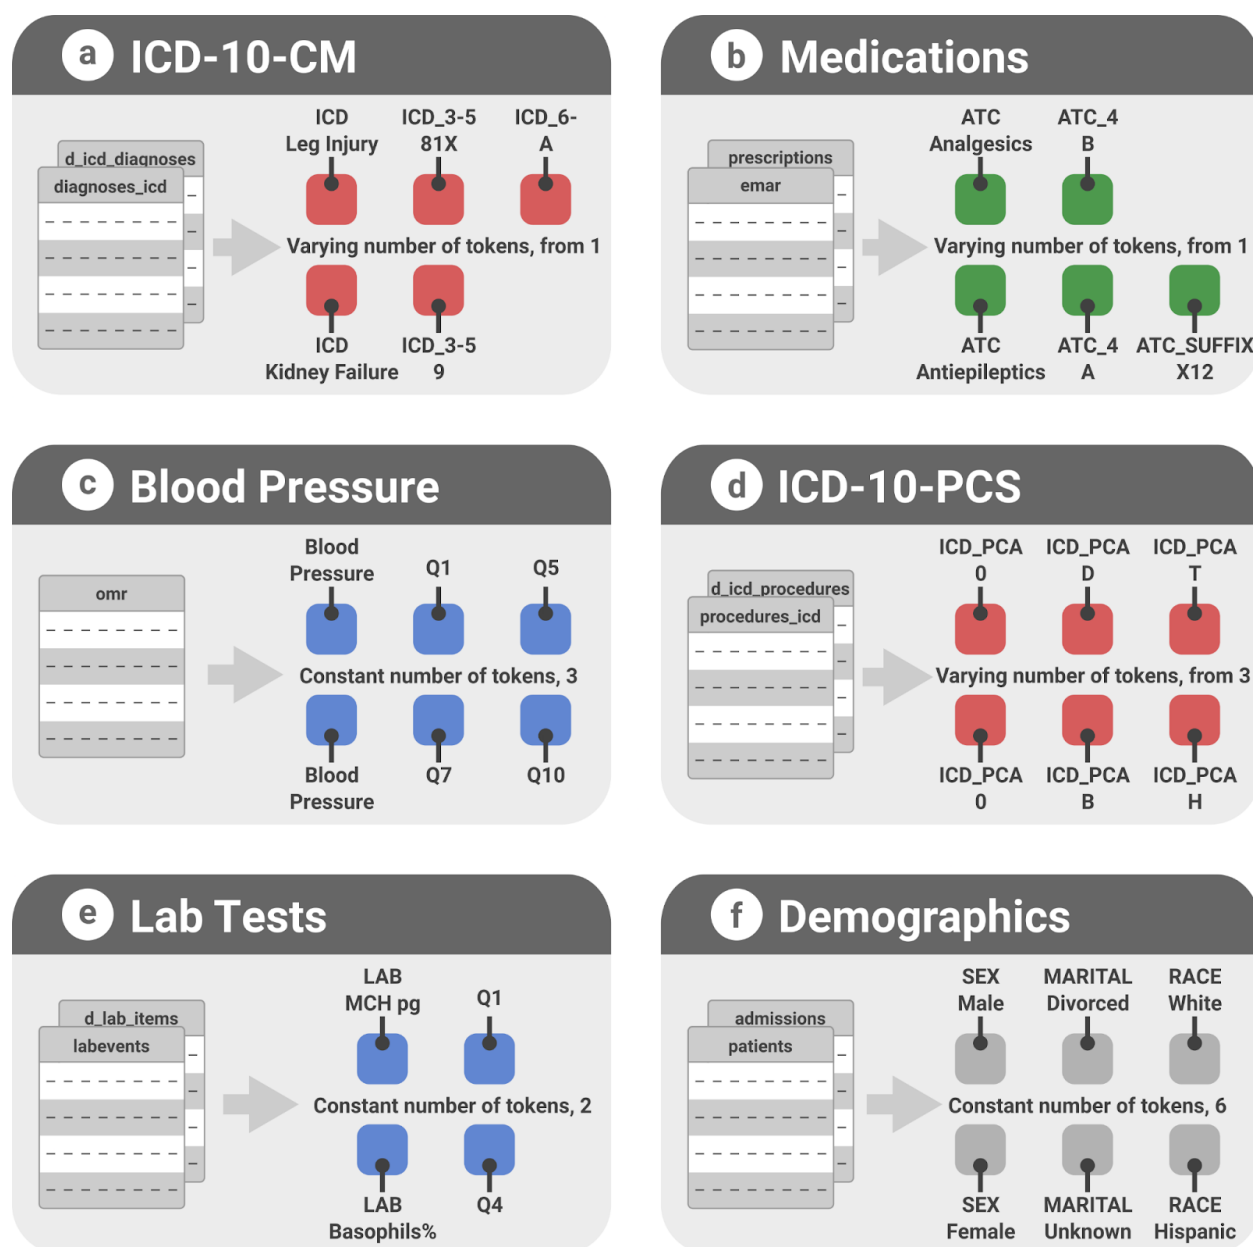

**Figure S5: Various examples of information encoding via tokens.** Depending on the ICD-10-CM code, 1 to 3 tokens are utilized for representation, with the first token corresponding to the code's first three characters, the fourth and fifth characters possibly represented by another token, and an optional third token for the remaining characters in the ICD code. (b) Medications, coded by ATC codes, are similarly encoded by 1 to 3 tokens based on the specificity of the code, with the first token representing the first three characters, the second for the next two, and the third for the remaining characters. (c) Blood pressure measurements are consistently encoded using three tokens: one to indicate the BP measurement and two quantile tokens for systolic and diastolic pressure values, respectively. (d) ICD-PCS codes may be represented by up to seven tokens, with each token denoting one character of the code. (e) Lab tests are depicted by a token that describes the type of test followed by a quantile token for the test's numerical value. Finally, (f) demographics are depicted which are part of static tokens, always positioned at the beginning of the PHT.

# Zero Shot Health Trajectory Prediction Using Transformer

| Method              | AUC   | 95% CI      |
|---------------------|-------|-------------|
| Logistic regression | 0.650 | 0.643-0.656 |
| Xgboost             | 0.675 | 0.669-0.681 |
| RNN                 | 0.661 | 0.654-0.668 |
| LSTM                | 0.660 | 0.654-0.667 |
| ETHOS (ours)        | 0.749 | 0.742-0.745 |

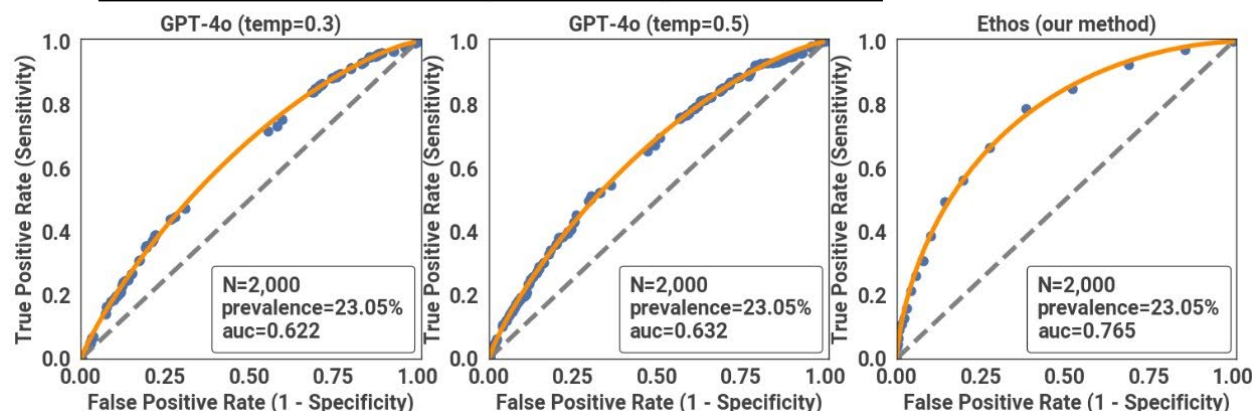

**Figure S6: Comparison of Ethos to existing methods.** Features were derived from patient hospitalization data following Tang et al. [2023]. Applying their algorithm was impractical due to the need to compute similarity scores for each admission pair in our larger dataset (400,000 vs. 14,500 admissions), which exceeded our 2TB RAM capacity. We therefore used only their data preprocessing and feature extraction methods. Modified code from Tang et al.'s repository is available on GitHub ([www.github.com/ipolharvard/readmit-stgcn](https://github.com/ipolharvard/readmit-stgcn)). For non-temporal models like Logistic Regression and XGBoost, time-varying features were summarized using statistical measures, and the day of admission was included as a feature. ETHOS was compared to GPT-4o at temperatures 0.3 and 0.5. We created a prompt directing the model to analyze 2048 tokens and calculate readmission probability for 2000 cases. ETHOS outperformed both GPT-4o variants.

# Zero Shot Health Trajectory Prediction Using Transformer

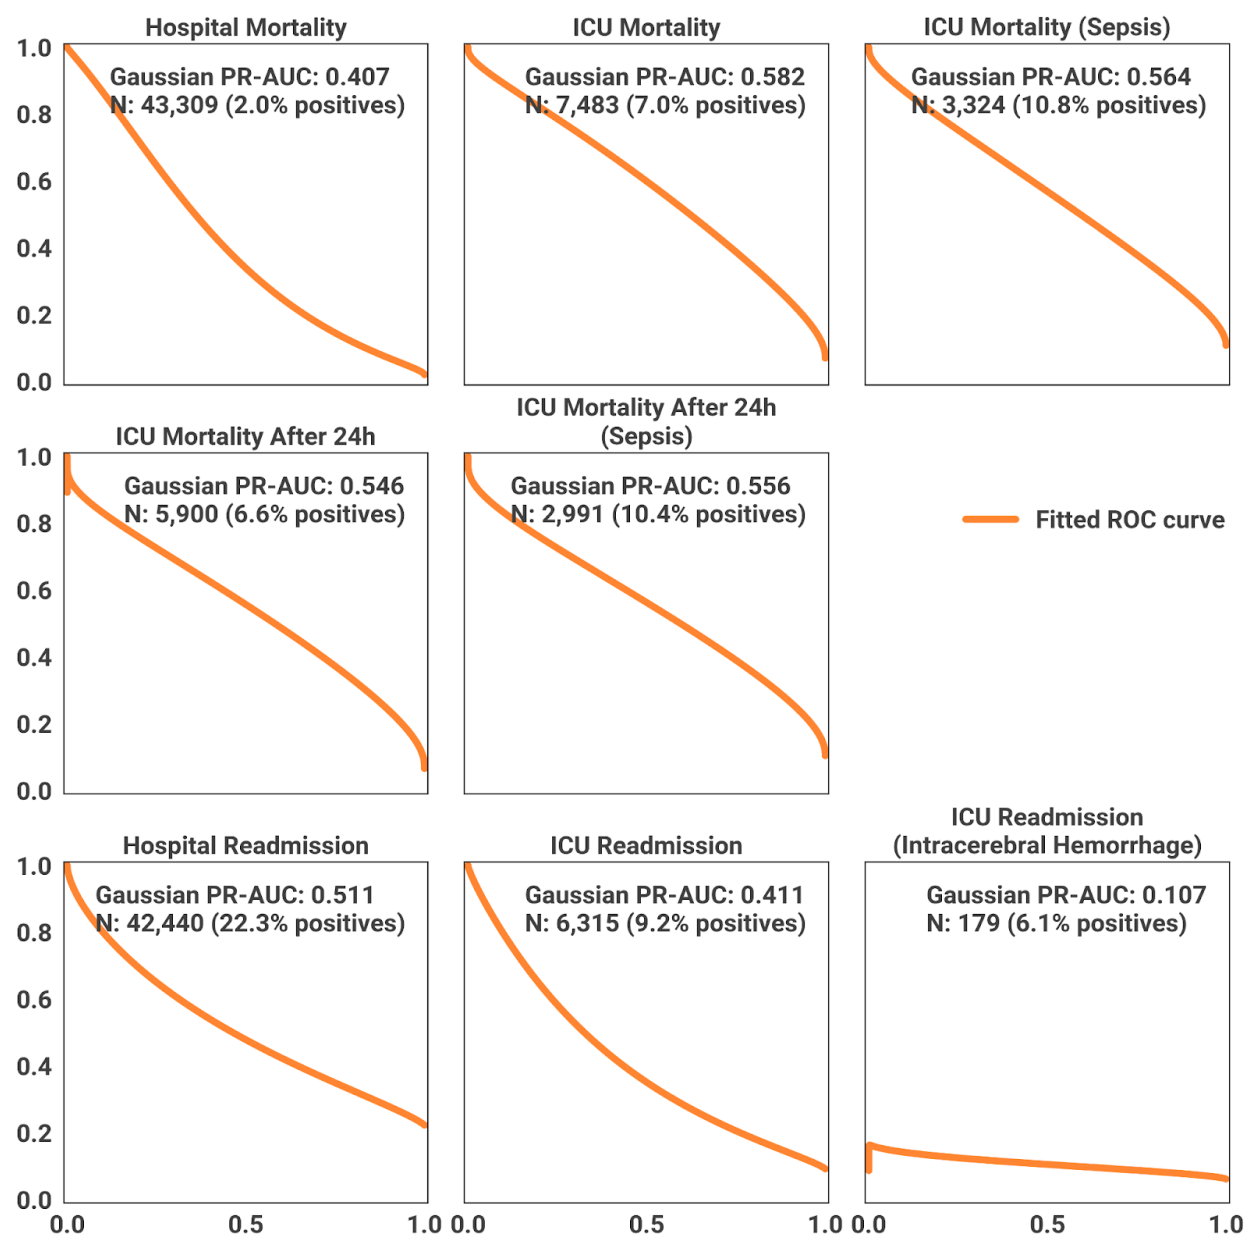

Figure S7: Precision-recall curves and corresponding scores for Predictive Tasks via the ETHOS Model.

# Zero Shot Health Trajectory Prediction Using Transformer

| Event or Information                     | Token # | # of Unique Tokens | Notes                                                                      |
|------------------------------------------|---------|--------------------|----------------------------------------------------------------------------|
| Sex                                      | 1       | 2                  | Always at position 1 in PHT                                                |
| Race                                     | 1       | 6                  | Always at position 2 in PHT                                                |
| Marital status                           | 1       | 5                  | Always at position 3 in PHT                                                |
| BMI                                      | 1       | 1 (+10)            | Always at position 4 in PHT                                                |
| Age at the start of timeline             | 1       | 21                 | Always at position 5 in PHT                                                |
| Years from 1970 at the start of timeline | 1       | 21                 | Always at position 6 in PHT                                                |
| Deaths                                   | 1       | 1                  | N/A                                                                        |
| Emergency Department Stays               | 2       | 2 (+10)            | Admission/discharge + Q                                                    |
| Inpatient Stays                          | 6       | 18 (+10)           | N/A                                                                        |
| Transfers                                | 1       | 19                 | 19 different transfer types                                                |
| ICU Stays                                | 4       | 11 (+10)           | N/A                                                                        |
| Diagnoses - ICD-10-CM                    | 1-3     | 2936               | N/A                                                                        |
| Procedures - ICD-10-PCS                  | 1-7     | 35                 | N/A                                                                        |
| Blood Pressure                           | 3       | 1 (+10)            | BP token + 2Qs (sys+dia)                                                   |
| Administered Medications                 | 1-3     | 312                | By tokenizing ATC code                                                     |
| Lab tests                                | 2       | 200 (+10)          | Used most frequent 200 lab tests + Q                                       |
| SOFA                                     | 2       | 1 (+10)            | Always follow ICU admin                                                    |
| DRG                                      | 1       | 772                | Always follow Q token after inpatient discharge. 771 DRG classes + unknown |

Table S2: Medical events extracted from the MIMIC database and an overview of the token encodings utilized.

# Zero Shot Health Trajectory Prediction Using Transformer

Table S3: Example of a tokenized timeline with a hospital admission

| Patient Health Timeline                                                  | Notes                                                                                                                                                       |
|--------------------------------------------------------------------------|-------------------------------------------------------------------------------------------------------------------------------------------------------------|
| ED_ADMISSION_START                                                       | Admission to Emergency Department                                                                                                                           |
| _2h-6h                                                                   | Time interval between 2h and 6h                                                                                                                             |
| LAB_pH_units                                                             | Lab test of pH and the unit is units                                                                                                                        |
| _Q4                                                                      | Quantile token referring to the lab test of pH                                                                                                              |
| LAB_Protein_mg/dL                                                        |                                                                                                                                                             |
| _Q4                                                                      |                                                                                                                                                             |
| LAB_RBC_#/hpf                                                            |                                                                                                                                                             |
| _Q1                                                                      |                                                                                                                                                             |
| LAB_Specific Gravity                                                     |                                                                                                                                                             |
| _Q2                                                                      |                                                                                                                                                             |
| LAB_WBC_#/hpf                                                            |                                                                                                                                                             |
| _Q1                                                                      |                                                                                                                                                             |
| LAB_Alanine Aminotransferase (ALT)_IU/L                                  |                                                                                                                                                             |
| _Q3                                                                      |                                                                                                                                                             |
| LAB_Albumin_g/dL                                                         |                                                                                                                                                             |
| _Q3                                                                      |                                                                                                                                                             |
| LAB_Alkaline Phosphatase_IU/L                                            |                                                                                                                                                             |
| _Q1                                                                      |                                                                                                                                                             |
| LAB_Anion Gap_mEq/L                                                      |                                                                                                                                                             |
| _Q5                                                                      |                                                                                                                                                             |
| LAB_Asparate Aminotransferase (AST)_IU/L                                 |                                                                                                                                                             |
| _Q8                                                                      |                                                                                                                                                             |
| LAB_MCHC_g/dL                                                            |                                                                                                                                                             |
| _Q9                                                                      |                                                                                                                                                             |
| LAB_MCV_fL                                                               |                                                                                                                                                             |
| _Q7                                                                      |                                                                                                                                                             |
| LAB_Monocytes_%                                                          |                                                                                                                                                             |
| _Q7                                                                      |                                                                                                                                                             |
| LAB_Neutrophils_%                                                        |                                                                                                                                                             |
| _Q3                                                                      |                                                                                                                                                             |
| LAB_Platelet Count_K/uL                                                  |                                                                                                                                                             |
| _Q3                                                                      |                                                                                                                                                             |
| LAB_RDW_%                                                                |                                                                                                                                                             |
| _Q1                                                                      |                                                                                                                                                             |
| LAB_Red Blood Cells_m/uL                                                 |                                                                                                                                                             |
| _Q8                                                                      |                                                                                                                                                             |
| LAB_White Blood Cells_K/uL                                               |                                                                                                                                                             |
| _Q5                                                                      |                                                                                                                                                             |
| LAB_Absolute Basophil Count_K/uL                                         |                                                                                                                                                             |
| _Q5                                                                      |                                                                                                                                                             |
| LAB_Absolute Eosinophil Count_K/uL                                       |                                                                                                                                                             |
| _Q4                                                                      |                                                                                                                                                             |
| LAB_Absolute Monocyte Count_K/uL                                         |                                                                                                                                                             |
| _Q6                                                                      |                                                                                                                                                             |
| _6h-12h                                                                  |                                                                                                                                                             |
| INPATIENT_ADMISSION_START                                                | Token indicating an admission to the hospital                                                                                                               |
| TYPE_OBSERVATION                                                         | The type of the admission is observation                                                                                                                    |
| INSURANCE_MEDICARE                                                       | The patient's insurance is MEDICARE                                                                                                                         |
| ICD_Other symptoms and signs involving cognitive functions and awareness | The primary diagnosis at the beginning of the hospital stay is Altered mental status, unspecified (R4182), which is broken down into two tokens: R41 and 82 |
| ICD_4-5_82                                                               |                                                                                                                                                             |
| ICD_Dorsalgia                                                            |                                                                                                                                                             |
| ICD_4-5_16                                                               |                                                                                                                                                             |

Continued on next page

# Zero Shot Health Trajectory Prediction Using Transformer

Table S3 – Continued from previous page

| Patient Health Timeline                           | Notes                                                                                               |
|---------------------------------------------------|-----------------------------------------------------------------------------------------------------|
| ICD_Malaise and fatigue                           |                                                                                                     |
| ICD_4-5_1                                         |                                                                                                     |
| ICD_Personal history of certain other diseases    |                                                                                                     |
| ICD_4-5_73                                        |                                                                                                     |
| ICD_Other hypothyroidism                          |                                                                                                     |
| ICD_4-5_9                                         |                                                                                                     |
| ICD_Type 2 diabetes mellitus                      |                                                                                                     |
| ICD_4-5_21                                        |                                                                                                     |
| ICD_Dorsalgia                                     |                                                                                                     |
| ICD_4-5_5                                         |                                                                                                     |
| ICD_Abnormalities of gait and mobility            |                                                                                                     |
| ICD_4-5_2                                         |                                                                                                     |
| TRANSFER_MED                                      | Transfer to a different care unit - MED                                                             |
| _6h-12h                                           |                                                                                                     |
| ATC_stomatological preparations                   |                                                                                                     |
| ATC_4_A                                           |                                                                                                     |
| ATC_SUFFIX_D05                                    |                                                                                                     |
| ATC_diuretics ATC_4_A                             |                                                                                                     |
| ATC_4_A                                           |                                                                                                     |
| ATC_SUFFIX_A03                                    |                                                                                                     |
| ATC_agents acting on the renin-angiotensin system |                                                                                                     |
| ATC_4_A                                           |                                                                                                     |
| ATC_SUFFIX_A03                                    |                                                                                                     |
| _6h-12h                                           |                                                                                                     |
| ED_ADMISSION_END                                  | Discharge from Emergency Department                                                                 |
| _Q10                                              | Quantile referring to the length of the stay in Emergency Department based on all stays in the data |
| INPATIENT_ADMISSION_END                           | Discharge from the hospital                                                                         |
| _Q2                                               | Quantile referring to the length of the stay in the hospital based on all stays in the data         |
| DISCHARGED_UNKNOWN                                | The reason of discharge                                                                             |
| UNKNOWN_DRG                                       | DRG assigned to the hospital stay                                                                   |
| _=6mt                                             | Time interval of 6 months                                                                           |

Table S4: Example of a tokenized timeline with an admission to ICU

| Patient Health Timeline             | Notes                               |
|-------------------------------------|-------------------------------------|
| ICU_STAY_START                      | Admission to ICU token              |
| Surgical Intensive Care Unit (SICU) | Type of ICU                         |
| SOFA                                | Indicates SOFA quantile follows     |
| _Q1                                 | Q indicating quantile of SOFA score |
| _15m-1h                             | time-interval                       |
| LAB_Sodium_mEq/L                    | Lab test results                    |
| _Q7                                 |                                     |
| LAB_Urea Nitrogen_mg/dL             |                                     |
| _Q3                                 |                                     |
| LAB_L_no_unit                       |                                     |
| _Q4                                 |                                     |
| _15m-1h                             | time-interval                       |
| LAB_Base Excess_mEq/L               |                                     |
| _Q6                                 |                                     |
| LAB_Calculated Total CO2_mEq/L      |                                     |
| _Q8                                 |                                     |

Continued on next page

# Zero Shot Health Trajectory Prediction Using Transformer

Table S4 – Continued from previous page

| Patient Health Timeline              | Notes                                                            |
|--------------------------------------|------------------------------------------------------------------|
| LAB_pCO2_mm Hg                       |                                                                  |
| _Q7                                  |                                                                  |
| LAB_pH_units                         |                                                                  |
| _Q7                                  |                                                                  |
| LAB_pO2_mm Hg                        |                                                                  |
| _Q5                                  |                                                                  |
| _2h-6h                               |                                                                  |
| ATC_anti-asthmatics                  | Medications start and administered with specified time intervals |
| ATC_4_A                              |                                                                  |
| ATC_SUFFIX_C02                       |                                                                  |
| _5m-15m                              |                                                                  |
| ATC_analgesics                       |                                                                  |
| ATC_4_B                              |                                                                  |
| ATC_SUFFIX_E01                       |                                                                  |
| _2h-6h                               |                                                                  |
| ATC_drugs for acid related disorders |                                                                  |
| ATC_4_B                              |                                                                  |
| ATC_SUFFIX_C02                       |                                                                  |
| _1h-2h                               |                                                                  |
| ATC_antithrombotic agents            |                                                                  |
| ATC_4_A                              |                                                                  |
| ATC_SUFFIX_B01                       |                                                                  |
| _15m-1h                              |                                                                  |
| ATC_beta blocking agents             |                                                                  |
| ATC_4_A                              |                                                                  |
| ATC_SUFFIX_B02                       |                                                                  |
| _1h-2h                               |                                                                  |
| ATC_mineral supplements              | Patient is medicated until the end of ICU stay                   |
| ATC_4_C                              |                                                                  |
| ATC_SUFFIX_C02                       |                                                                  |
| _15m-1h                              |                                                                  |
| ATC_laxatives                        |                                                                  |
| ATC_4_                               |                                                                  |
| A ATC_SUFFIX_D04                     |                                                                  |
| _1h-2h                               |                                                                  |
| ATC_analgesics                       |                                                                  |
| ATC_4_B                              |                                                                  |
| ATC_SUFFIX_E01                       |                                                                  |
| _15m-1h                              |                                                                  |
| ATC_antipruritics, anesthetics, etc. |                                                                  |
| ATC_4_                               |                                                                  |
| A ATC_SUFFIX_A32                     |                                                                  |
| LAB_Hematocrit_%                     | Here lab test results are reported                               |
| _Q7                                  |                                                                  |
| LAB_Hemoglobin_g/dL                  |                                                                  |
| _Q6                                  |                                                                  |
| LAB_MCH_pg                           |                                                                  |
| _Q8                                  |                                                                  |
| LAB_MCHC_g/dL                        |                                                                  |
| _Q5                                  |                                                                  |
| LAB_MCV_fL                           |                                                                  |
| _Q9                                  |                                                                  |
| LAB_Platelet Count_K/uL              |                                                                  |
| _Q3                                  |                                                                  |
| LAB_RDW_%                            |                                                                  |

Continued on next page

# Zero Shot Health Trajectory Prediction Using Transformer

Table S4 – Continued from previous page

| Patient Health Timeline    | Notes                                                                                         |
|----------------------------|-----------------------------------------------------------------------------------------------|
| _Q4                        |                                                                                               |
| LAB_Red Blood Cells_m/uL   |                                                                                               |
| _Q5                        |                                                                                               |
| LAB_White Blood Cells_K/uL |                                                                                               |
| _Q4                        |                                                                                               |
| LAB_RDW-SD_fL              |                                                                                               |
| _Q6                        |                                                                                               |
| LAB_INR(PT)_no_unit        |                                                                                               |
| _Q4                        |                                                                                               |
| LAB_PT_sec                 |                                                                                               |
| _Q5                        |                                                                                               |
| LAB_PTT_sec                |                                                                                               |
| _Q2                        |                                                                                               |
| LAB_Anion Gap_mEq/L        |                                                                                               |
| _Q4                        |                                                                                               |
| LAB_Bicarbonate_mEq/L      |                                                                                               |
| _Q4                        |                                                                                               |
| LAB_Calcium, Total_mg/dL   |                                                                                               |
| _Q3                        |                                                                                               |
| LAB_Chloride_mEq/L         |                                                                                               |
| _Q5                        |                                                                                               |
| LAB_Creatinine_mg/dL       |                                                                                               |
| _Q2                        |                                                                                               |
| LAB_Glucose_mg/dL          |                                                                                               |
| _Q8                        |                                                                                               |
| LAB_H_no_unit              |                                                                                               |
| _Q9                        |                                                                                               |
| LAB_I_no_unit              |                                                                                               |
| _Q2                        |                                                                                               |
| LAB_Magnesium_mg/dL        |                                                                                               |
| _Q2                        |                                                                                               |
| LAB_Phosphate_mg/dL        |                                                                                               |
| _Q1                        |                                                                                               |
| LAB_Potassium_mEq/L        |                                                                                               |
| _Q6                        |                                                                                               |
| LAB_Sodium_mEq/L           |                                                                                               |
| _Q6                        |                                                                                               |
| LAB_Urea Nitrogen_mg/dL    |                                                                                               |
| _Q2                        |                                                                                               |
| LAB_L_no_unit              |                                                                                               |
| _Q2                        |                                                                                               |
| _1h-2h                     |                                                                                               |
| ATC_antithrombotic agents  |                                                                                               |
| ATC_4_A                    |                                                                                               |
| ATC_SUFFIX_B01             |                                                                                               |
| ICU_STAY_END               | Patient is discharged from ICU                                                                |
| _Q5                        | Quantile token indicates the length of stay in ICU.<br>Here it is 5, indicating about average |
